# Supplementary material for: HTR1B regulates mitochondrial homeostasis and mitophagy by activating the ERK/ MAPK signalling pathway during human embryonic arrest
Source: PubMed Central journal article supplement — Heliyon. 2024 Jun 17;10(12):e33132. doi: 10.1016/j.heliyon.2024.e33132 (PMC11253063; doi:10.1016/j.heliyon.2024.e33132), 2024-06-17

Figure.1A

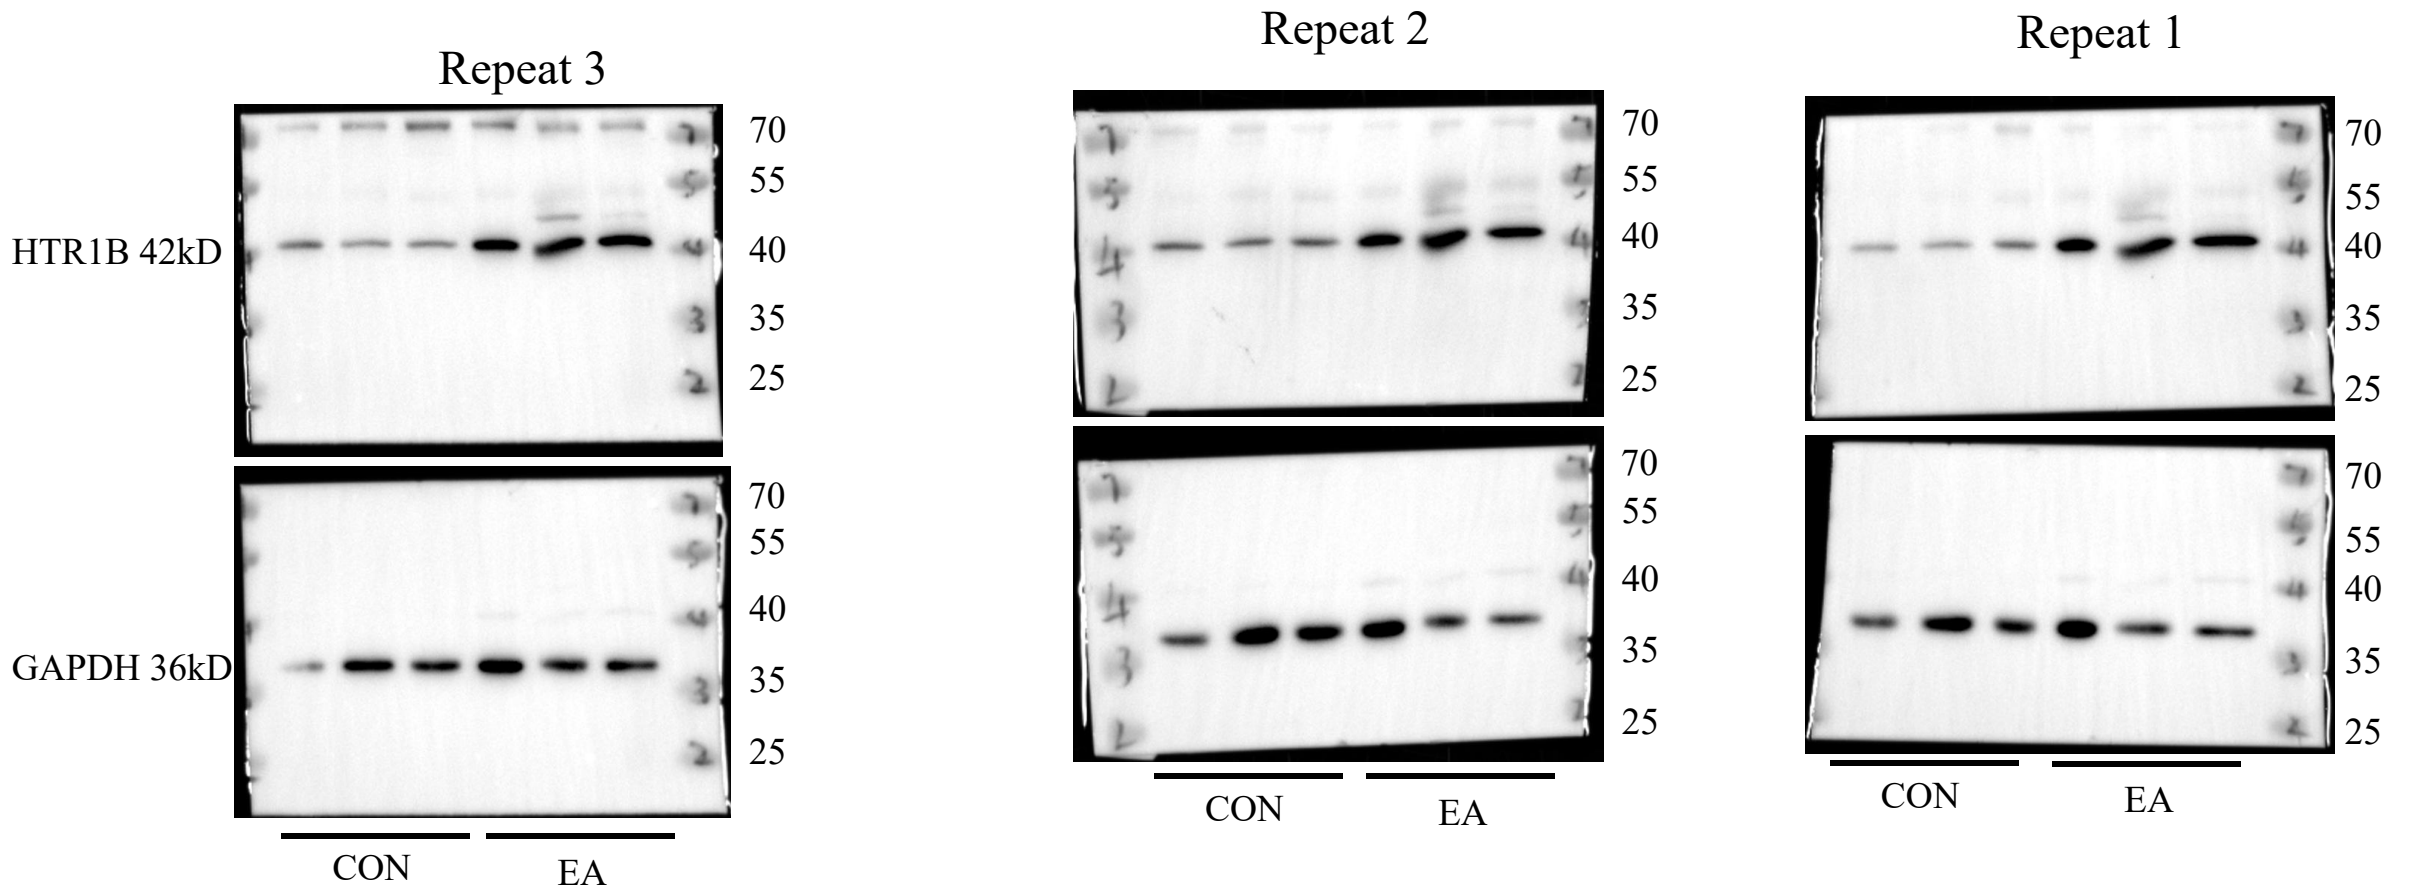

Figure.2A

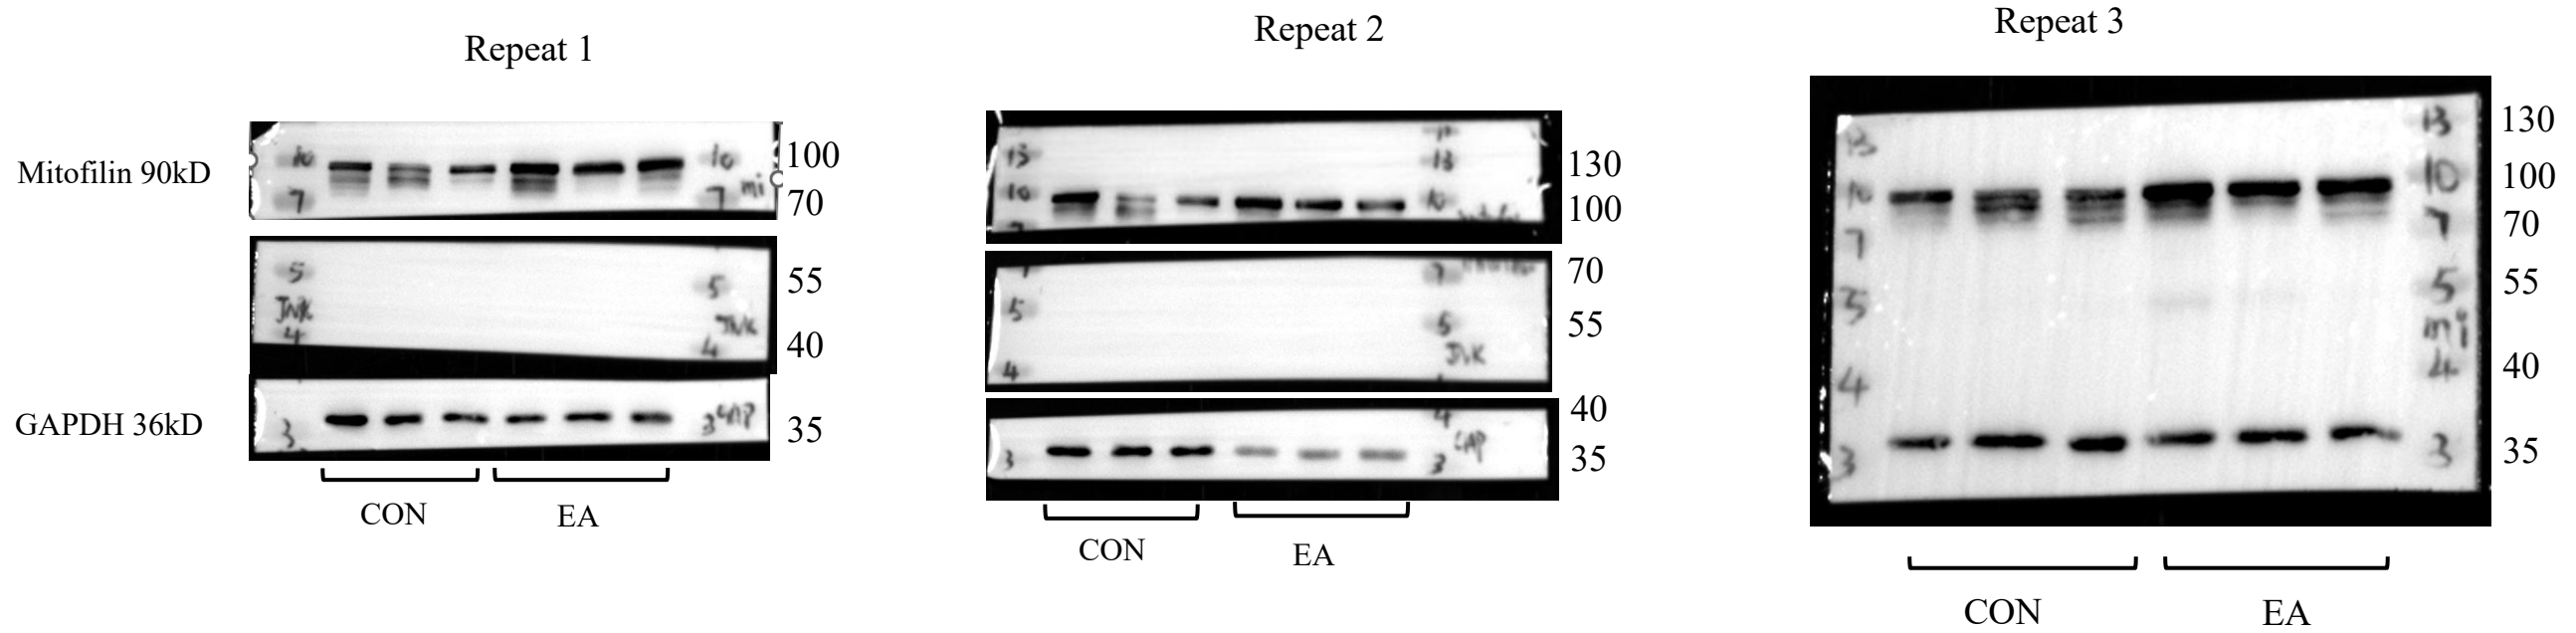

# Figure.2A

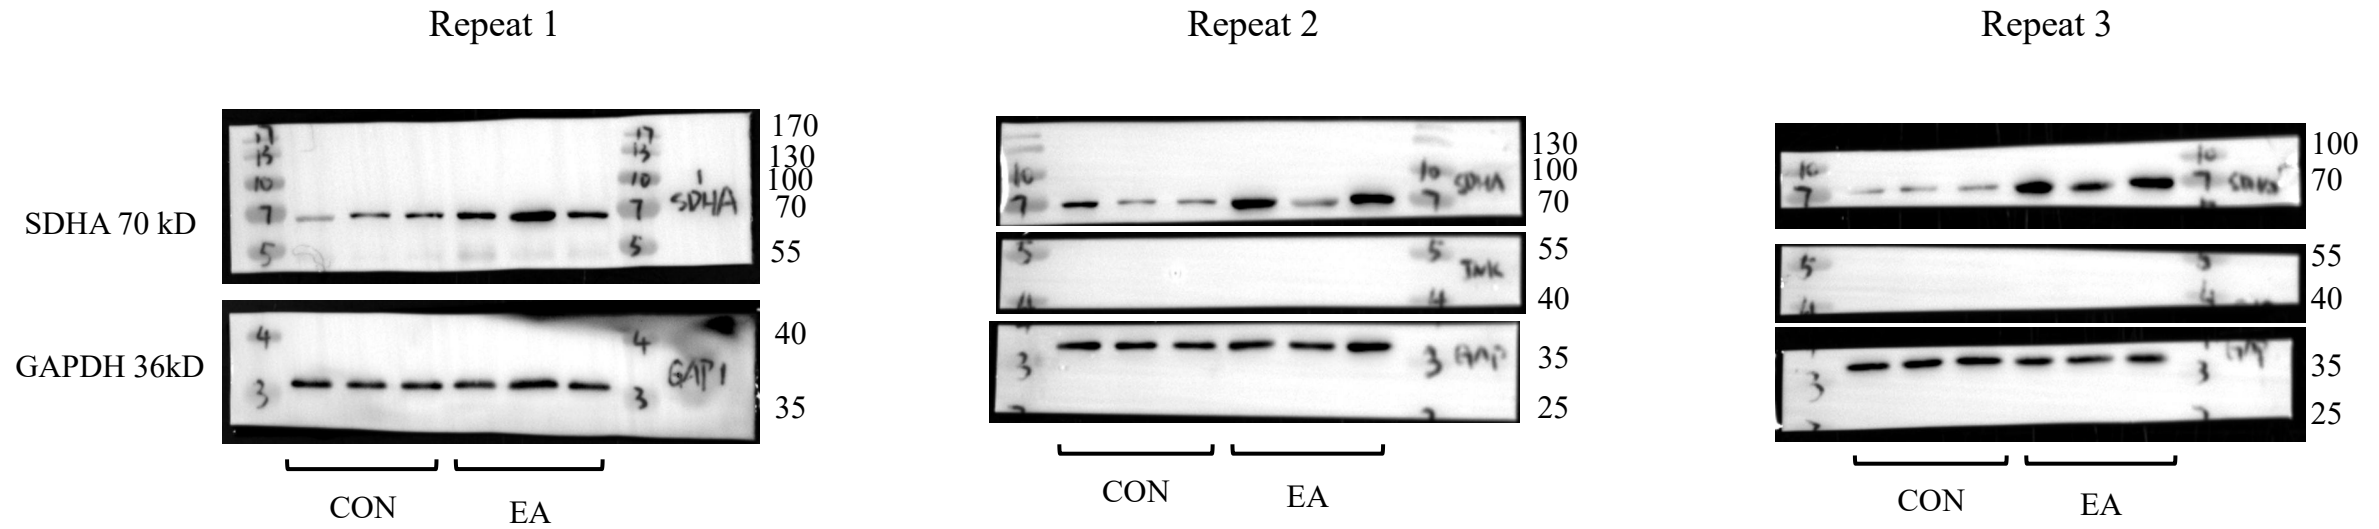

Figure.2A

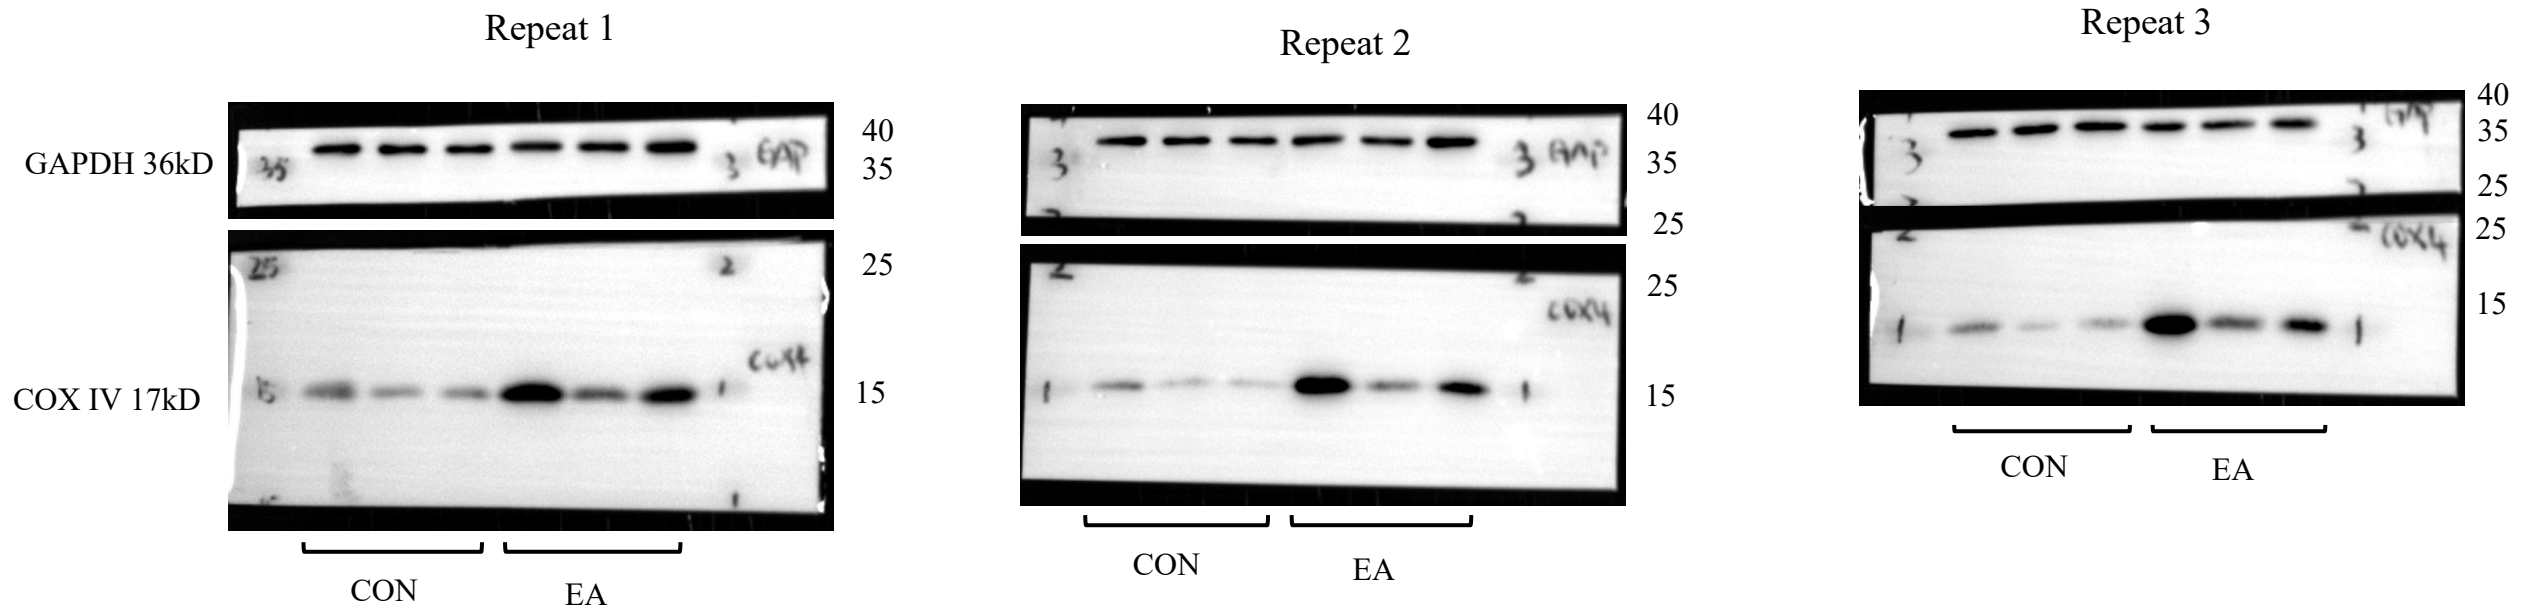

Figure.2E

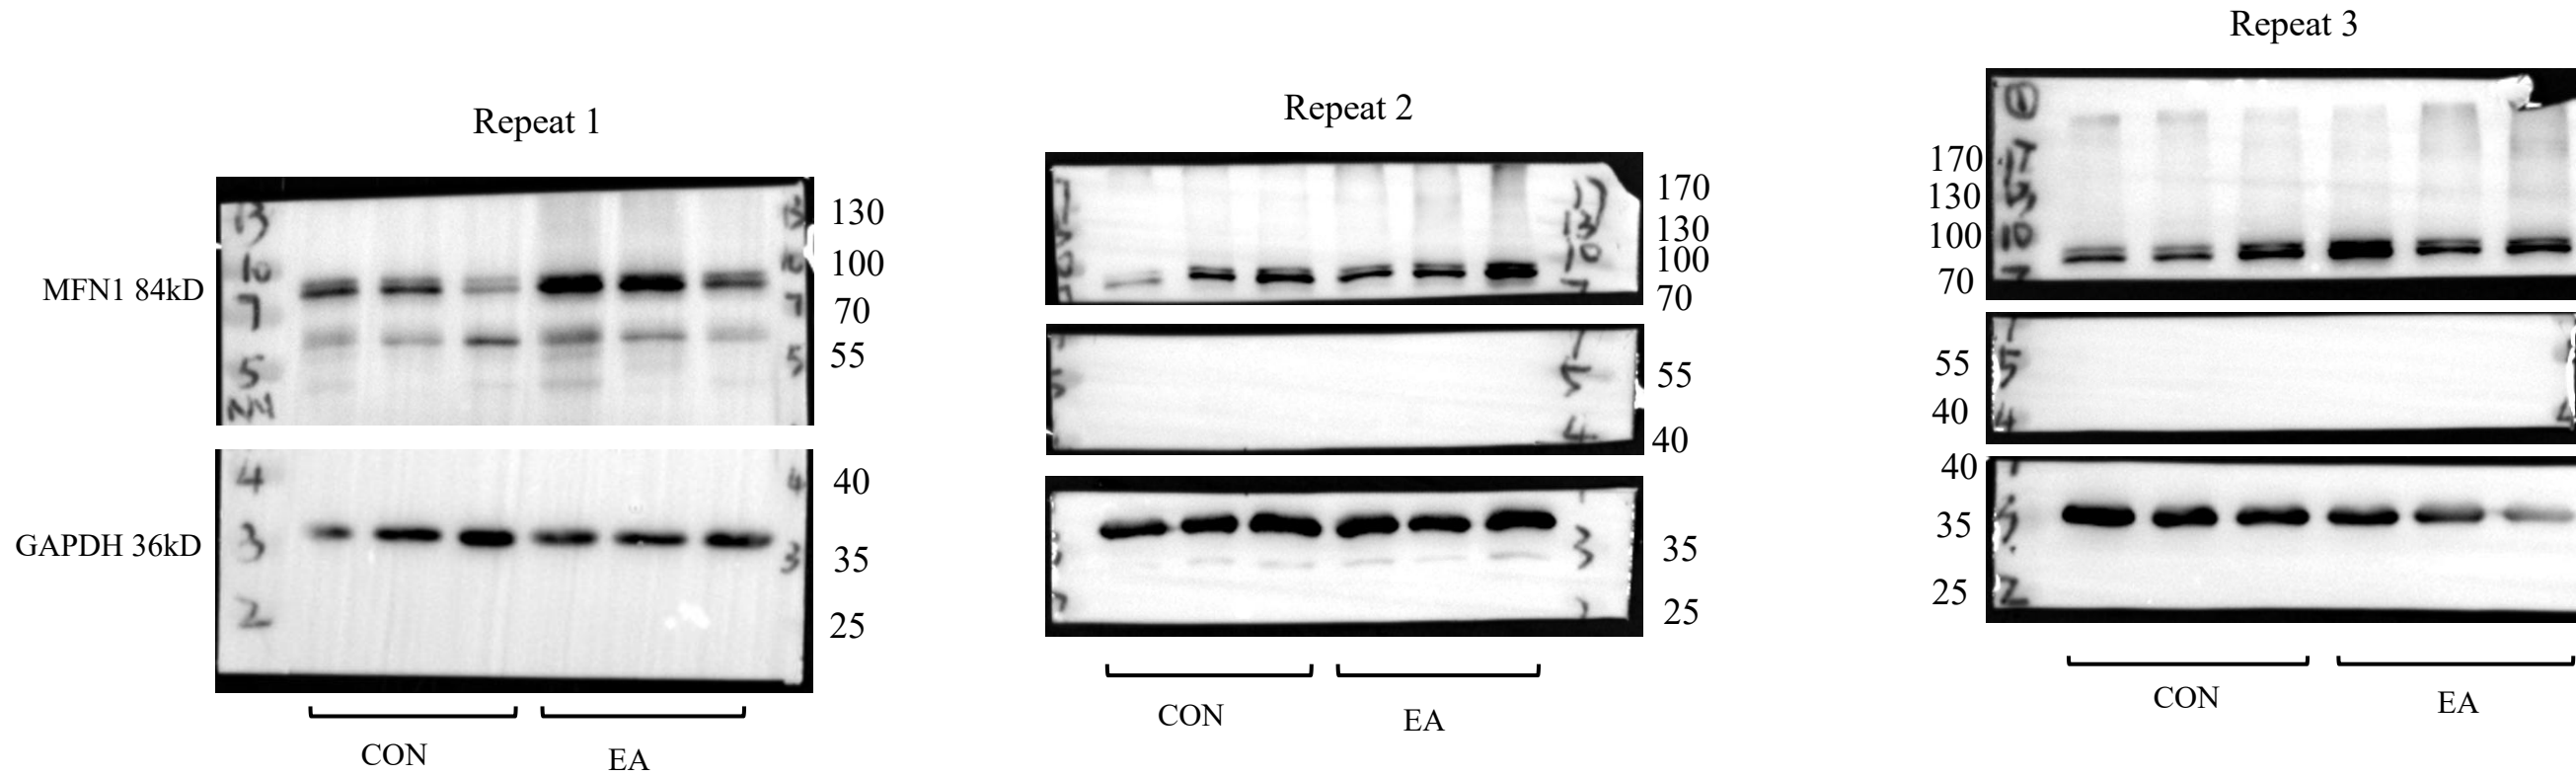

Figure.2E

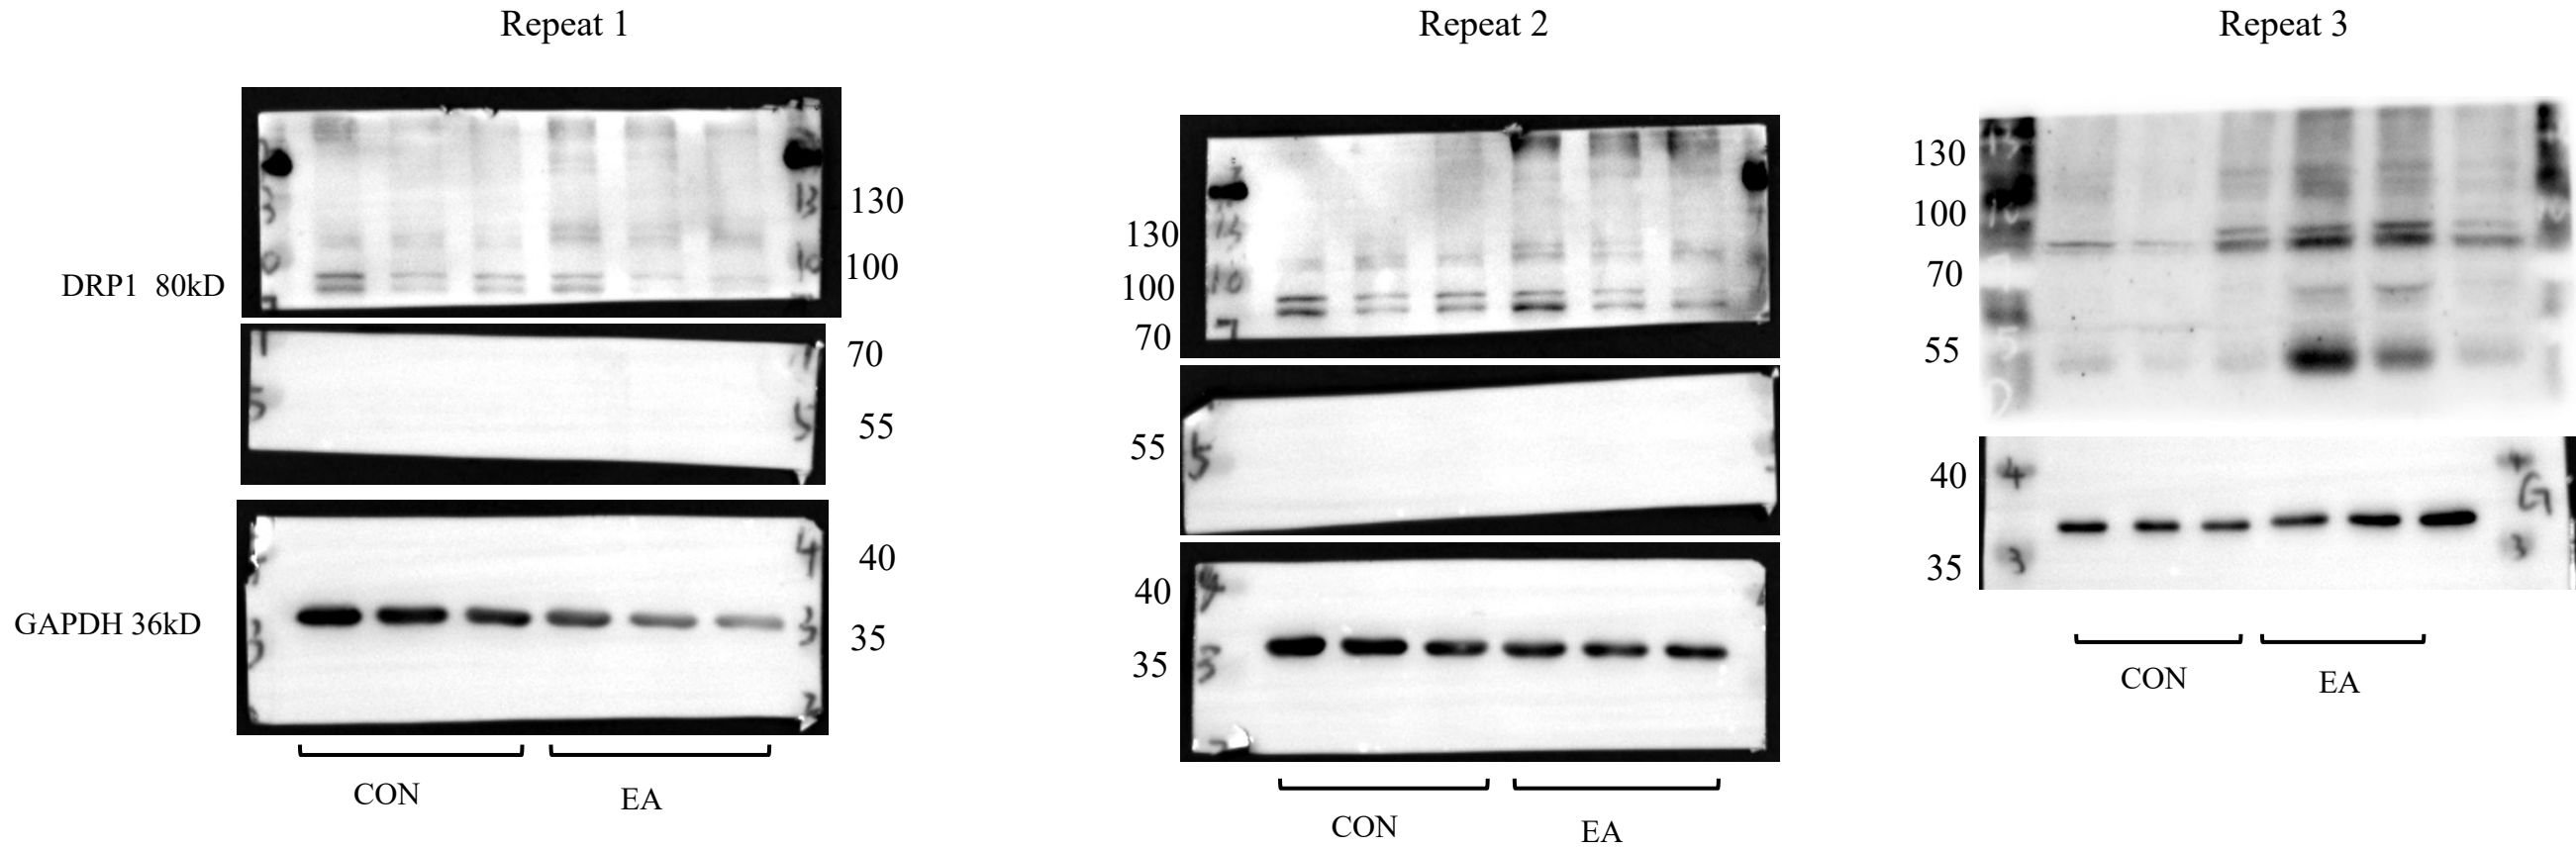

Figure.2E

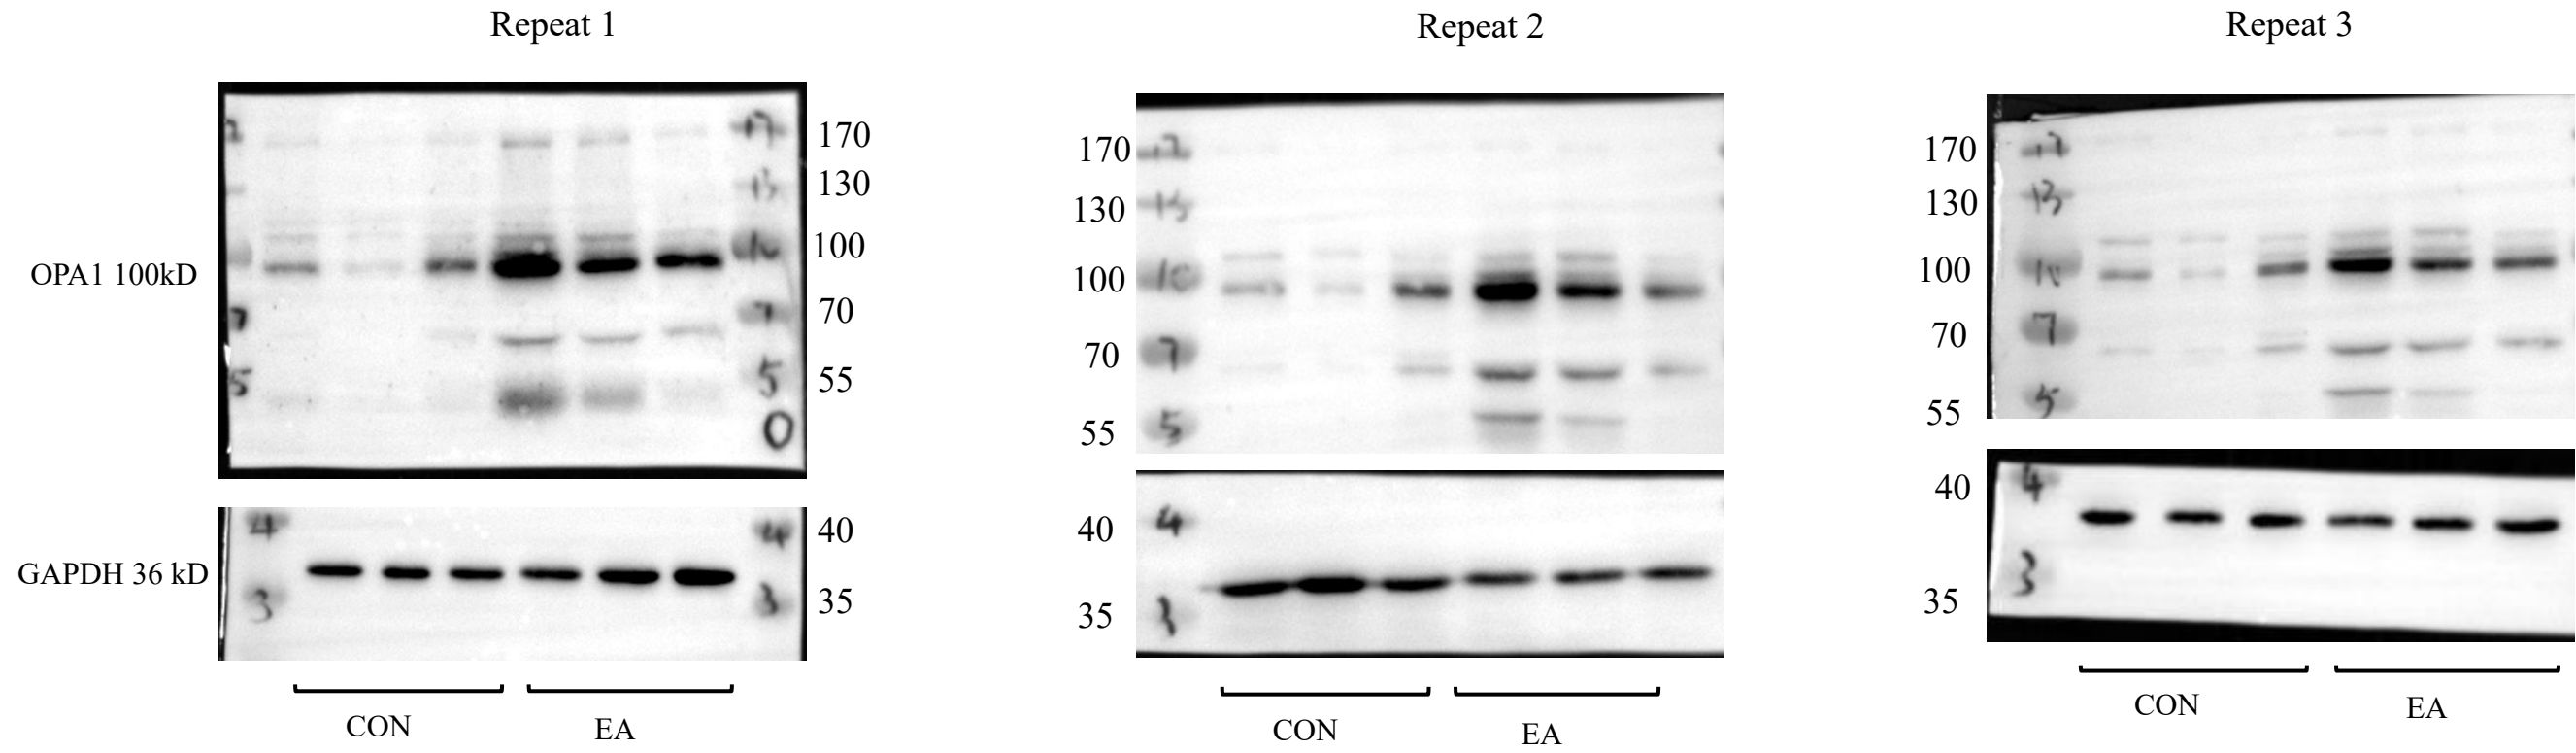

Figure.2I

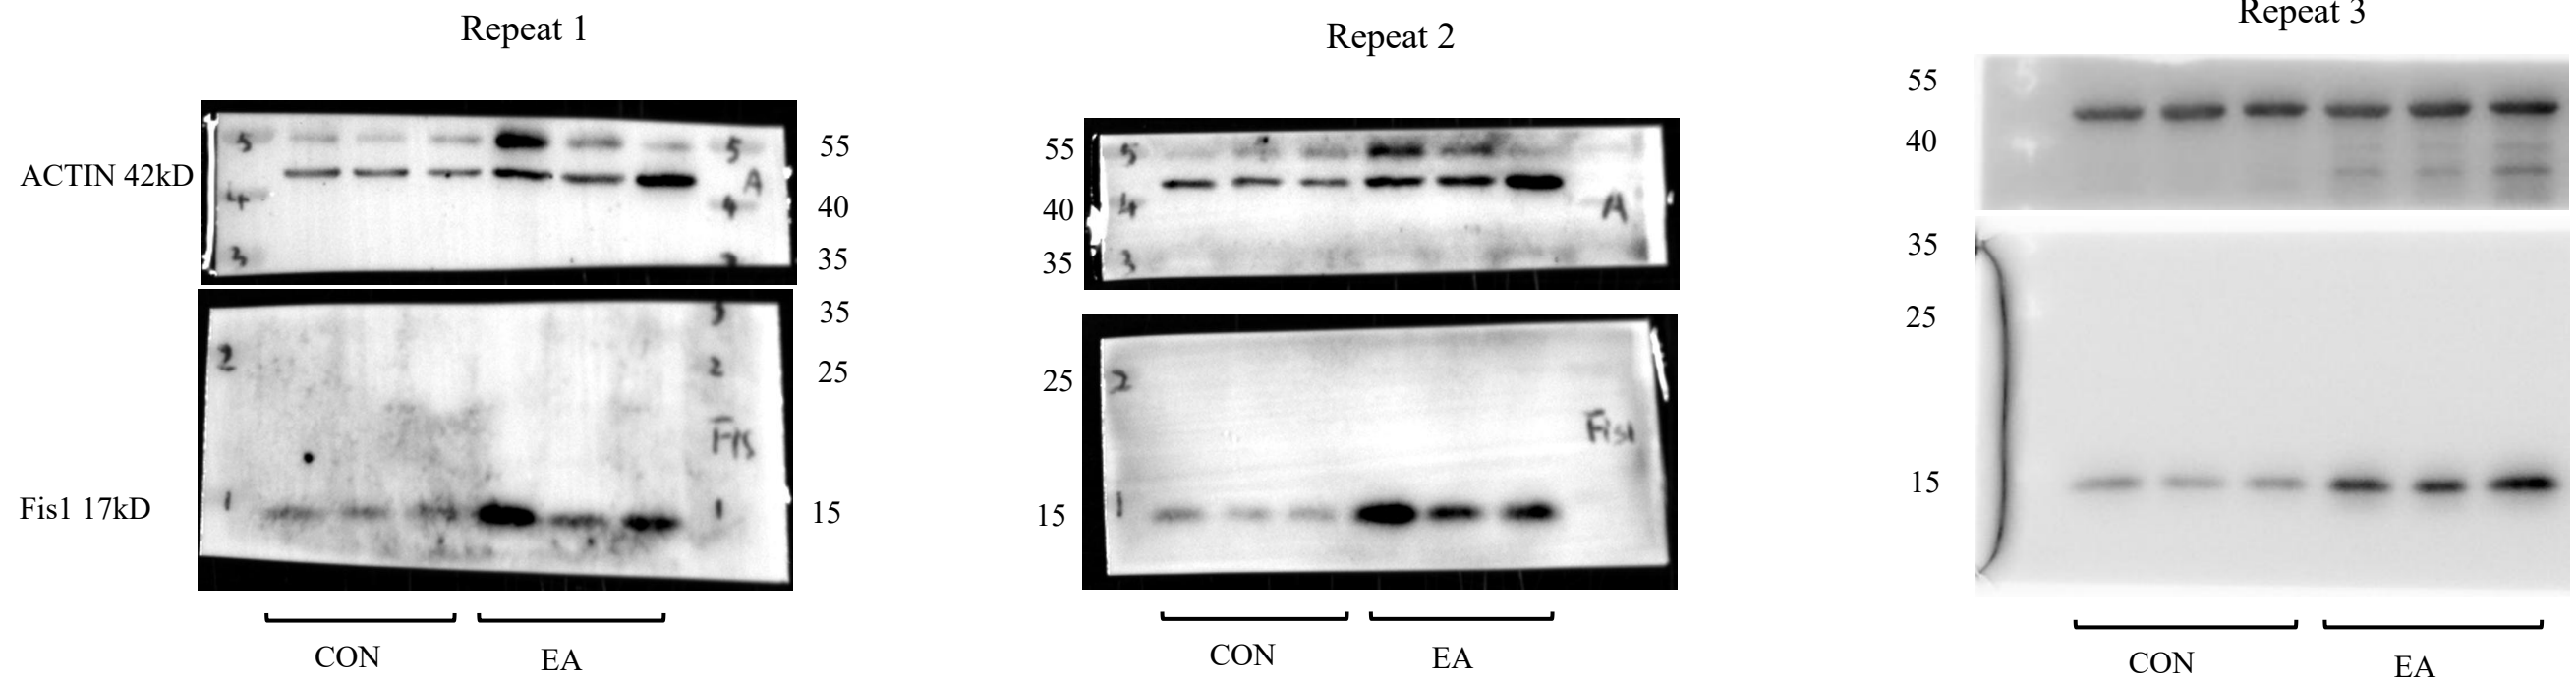



Figure.2I

Repeat 1

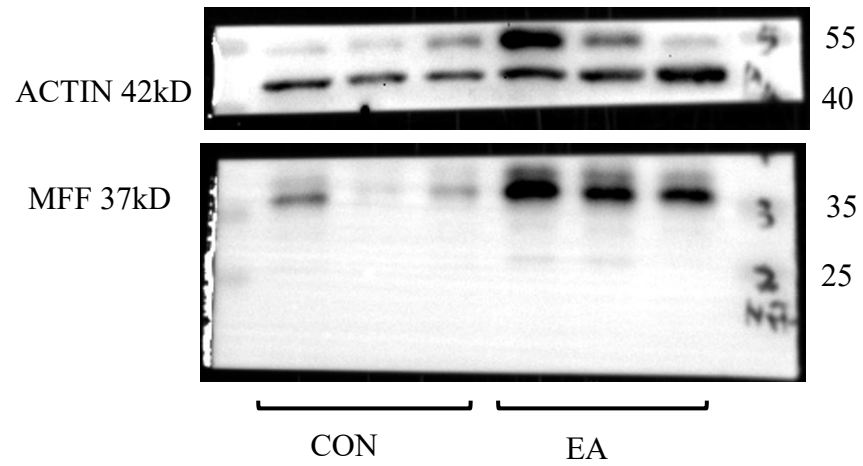

Repeat 2

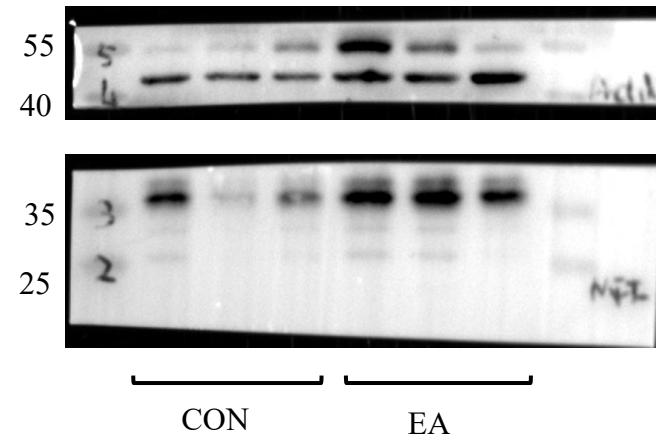

Repeat 3

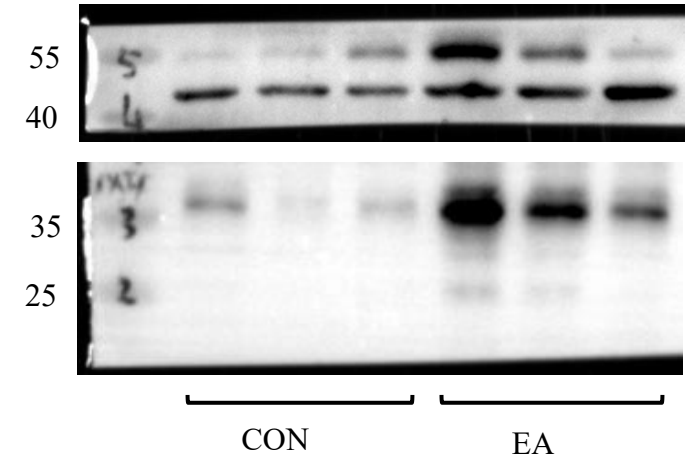



# Figure.3A

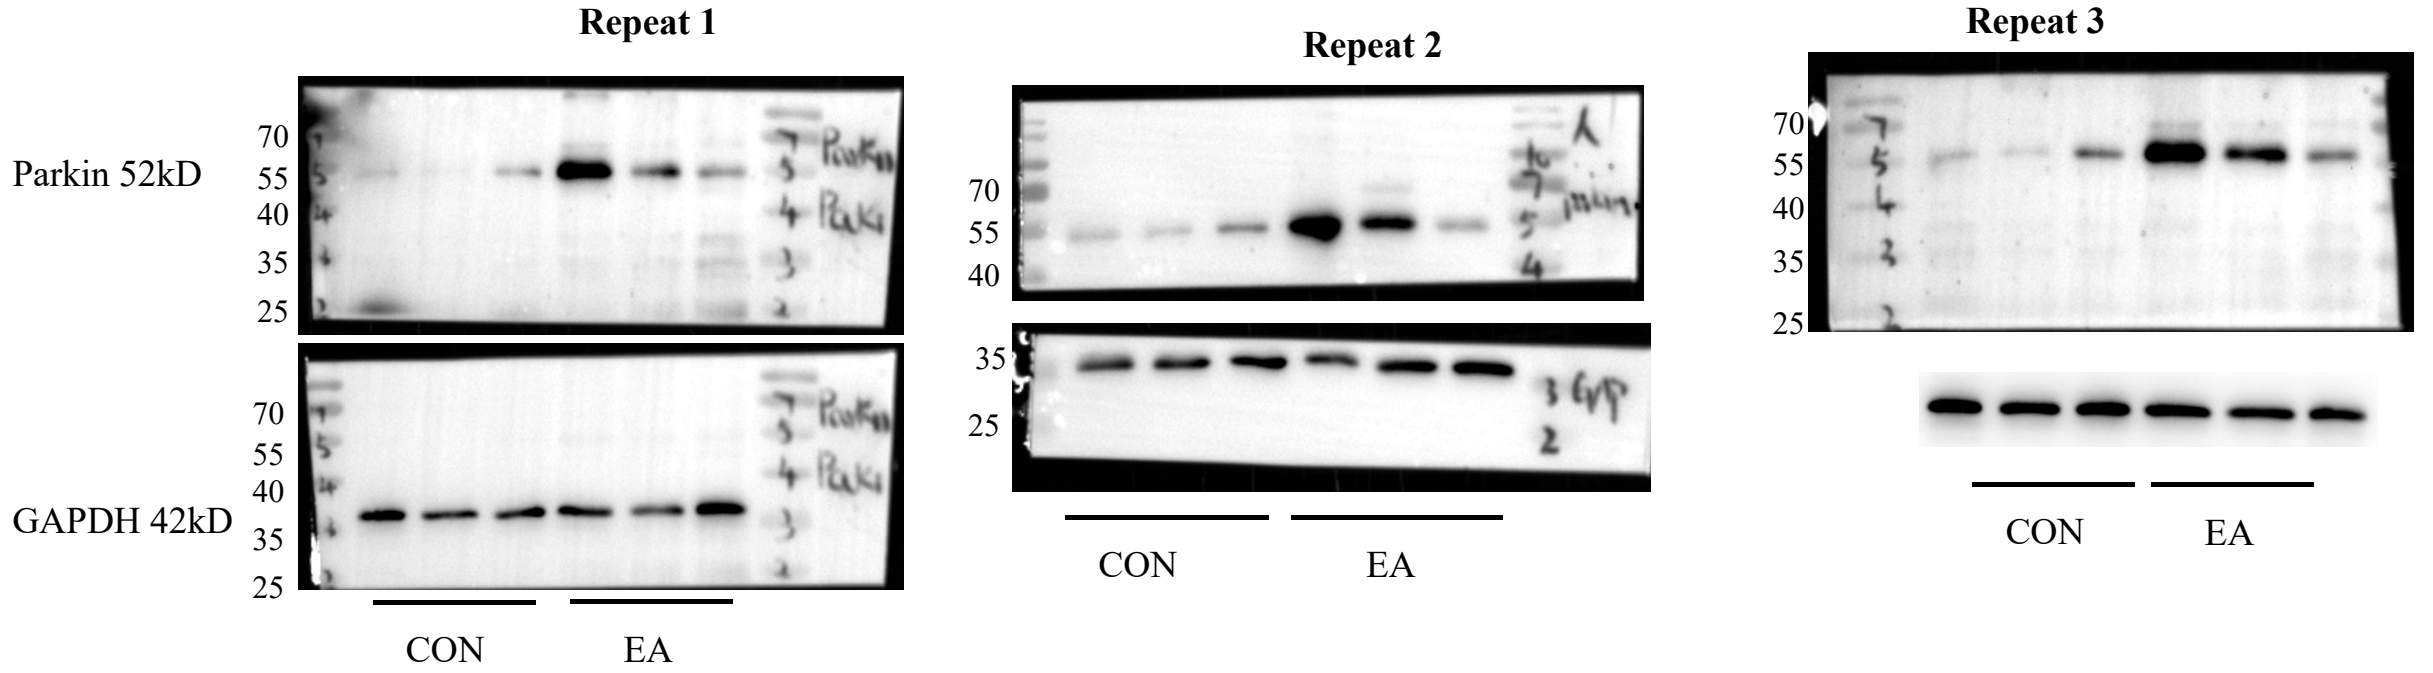

# Figure.3A

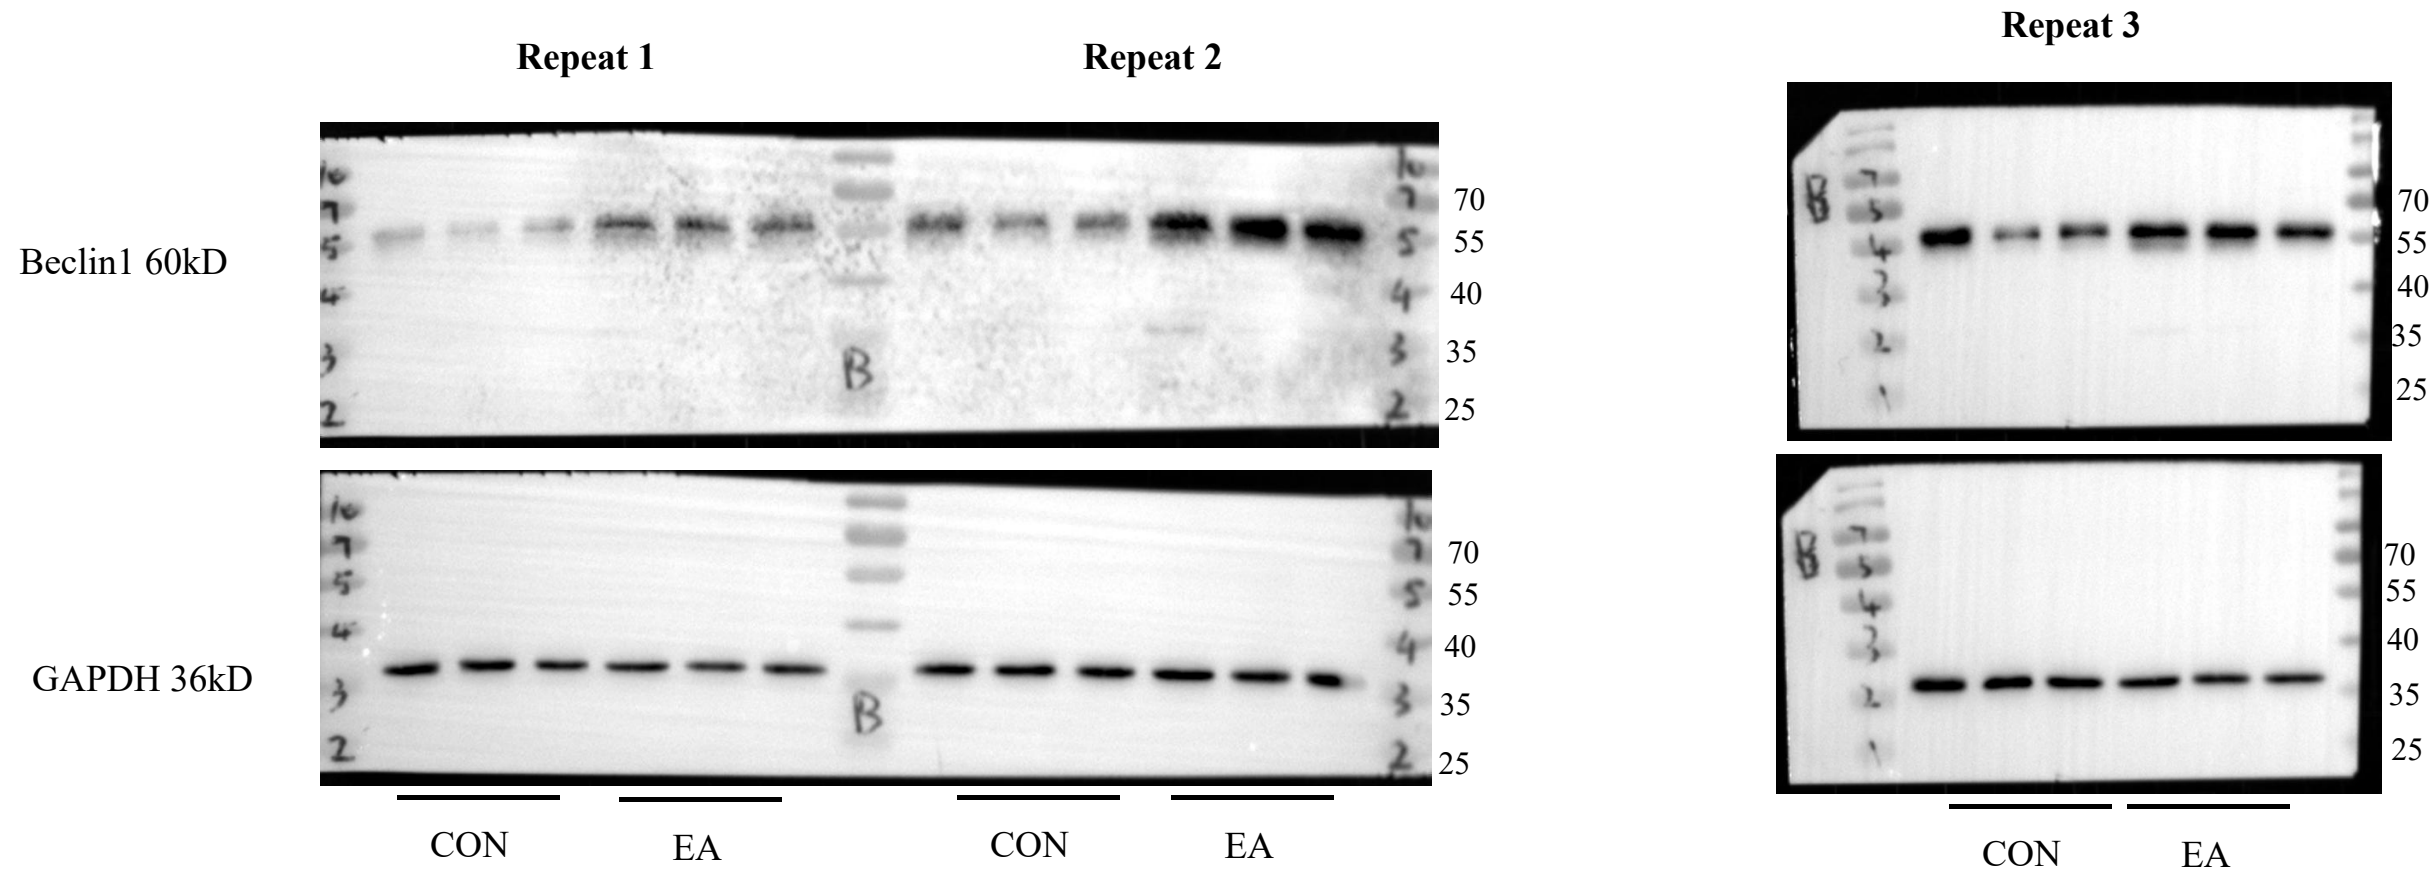

# Figure.3A

## Repeat 1

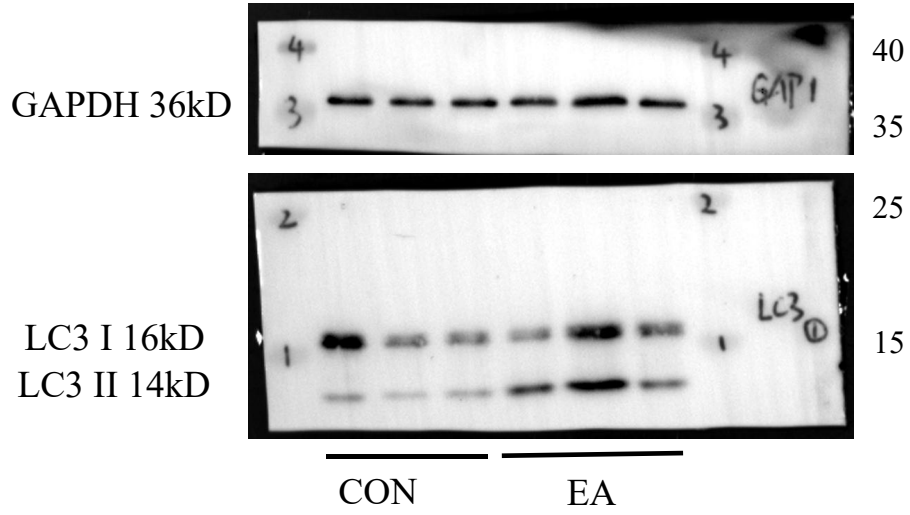

## Repeat 2

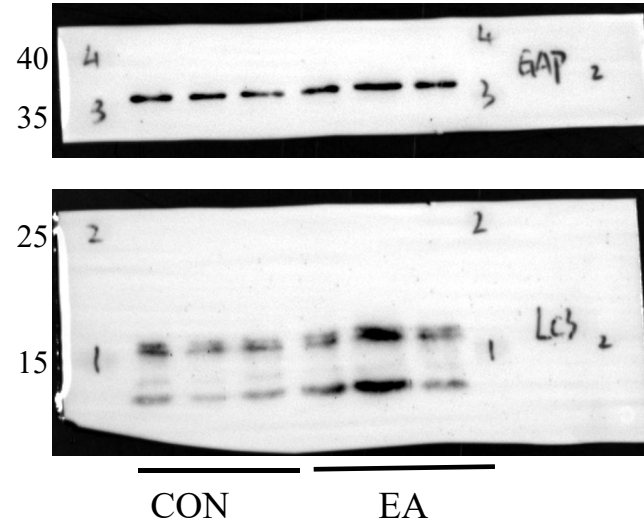

## Repeat 3

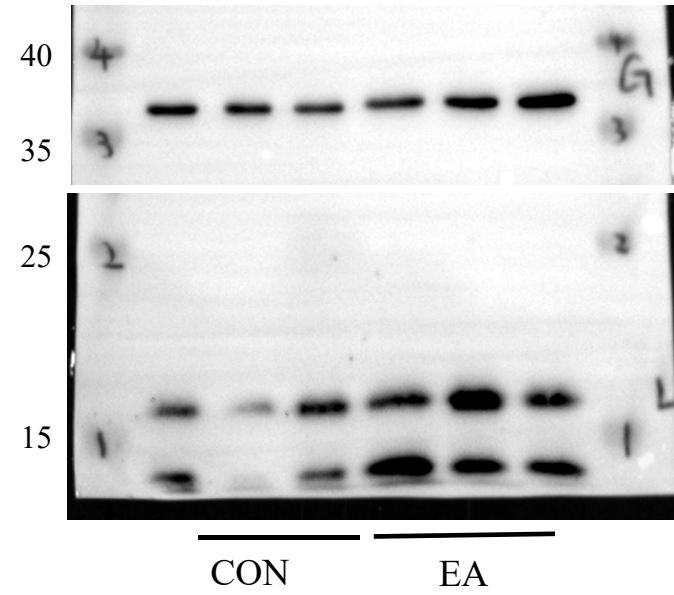

# Figure.4A

Repeat 1

Repeat 2

Repeat 3

T-ERK 40kD

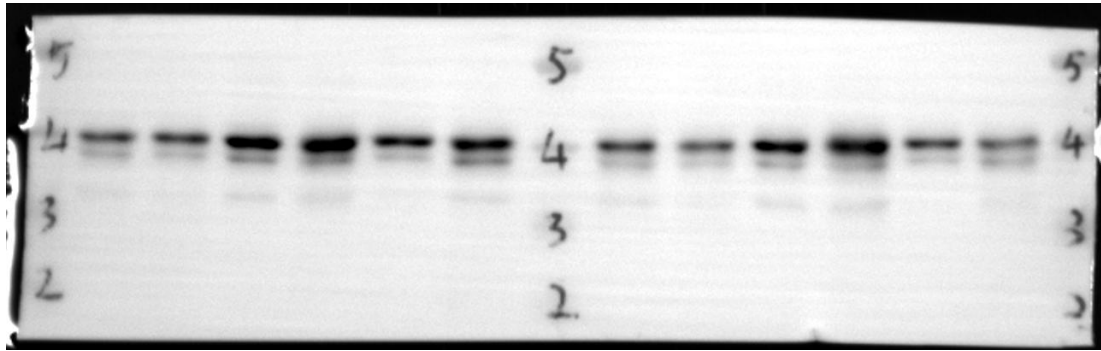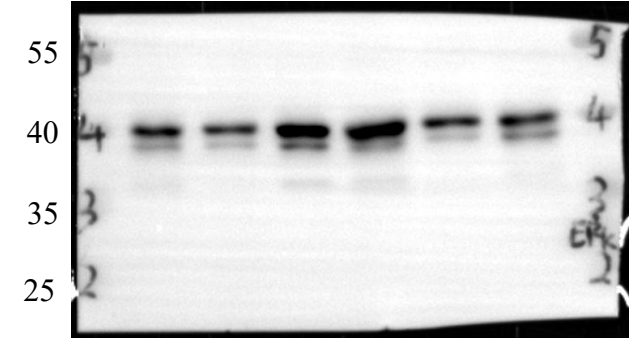

GAPDH 36 kD

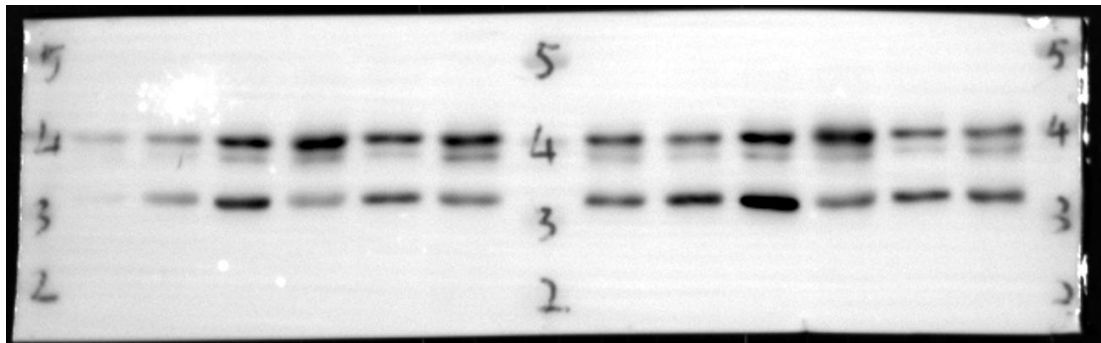

CON

EA

CON

EA

CON

EA

# Figure.4A

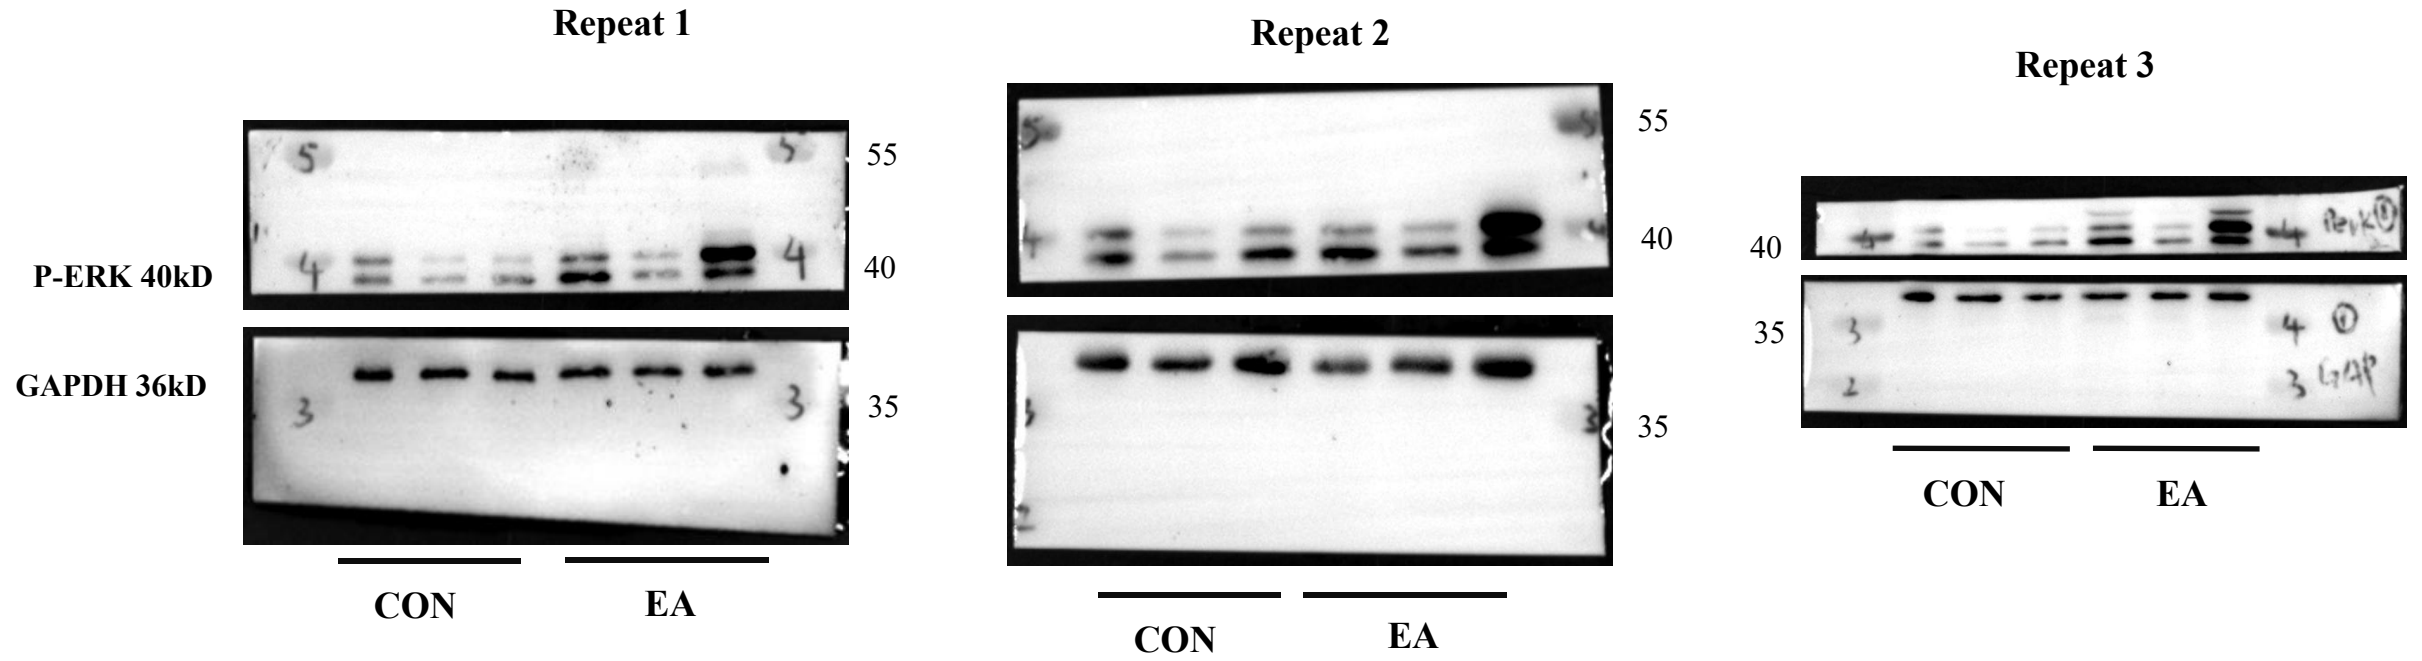

Figure.4A

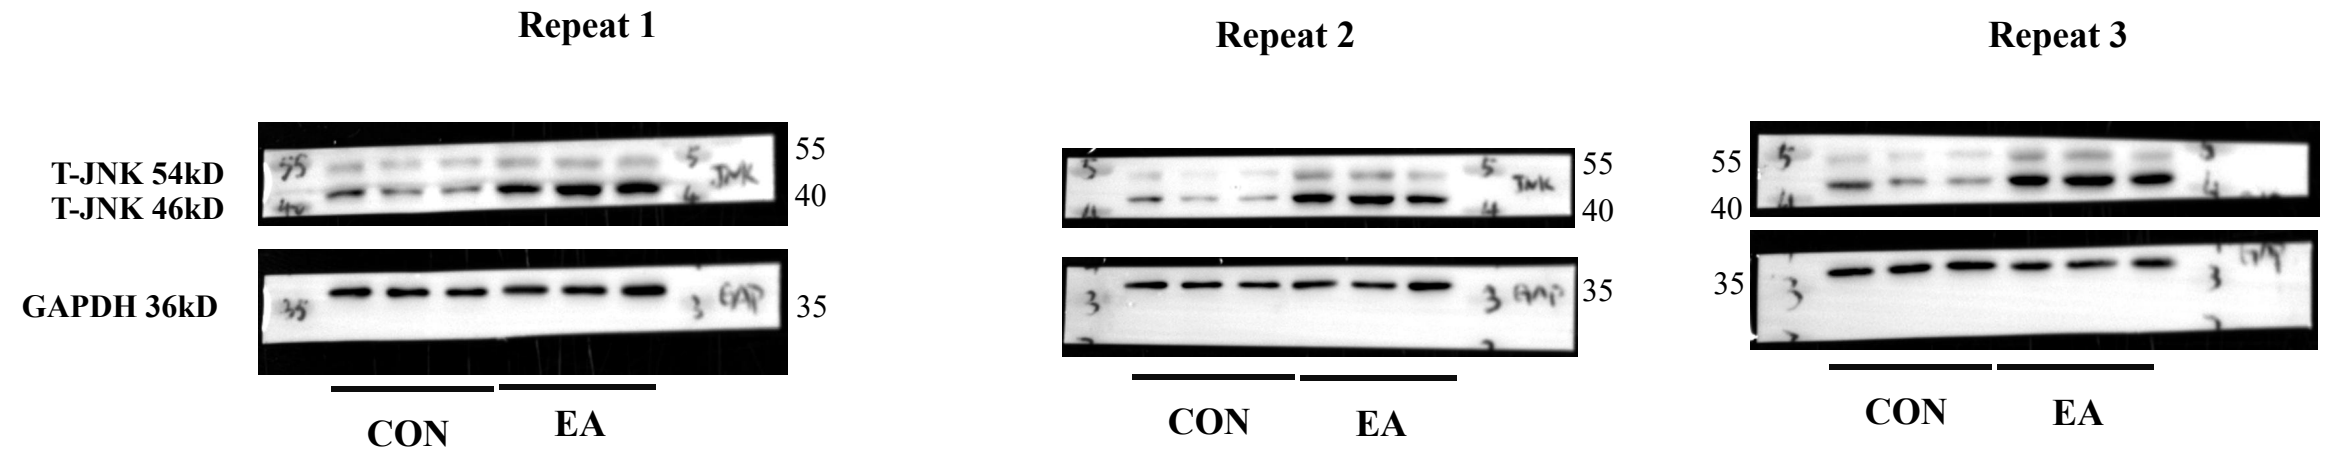



Figure.4A

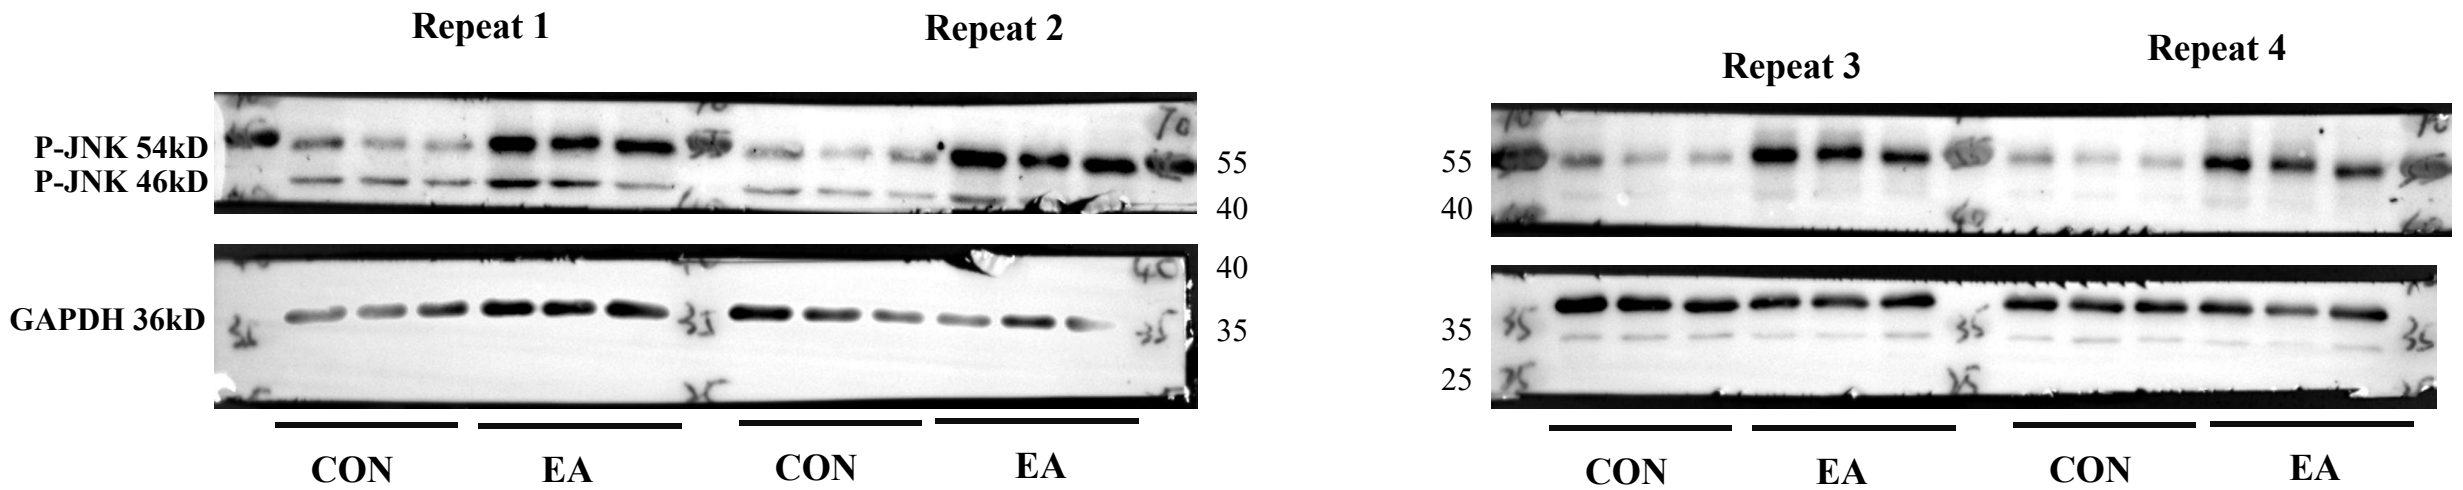

Figure 4A

Repeat 1

Repeat 2

Repeat 3

T-P38 38kD

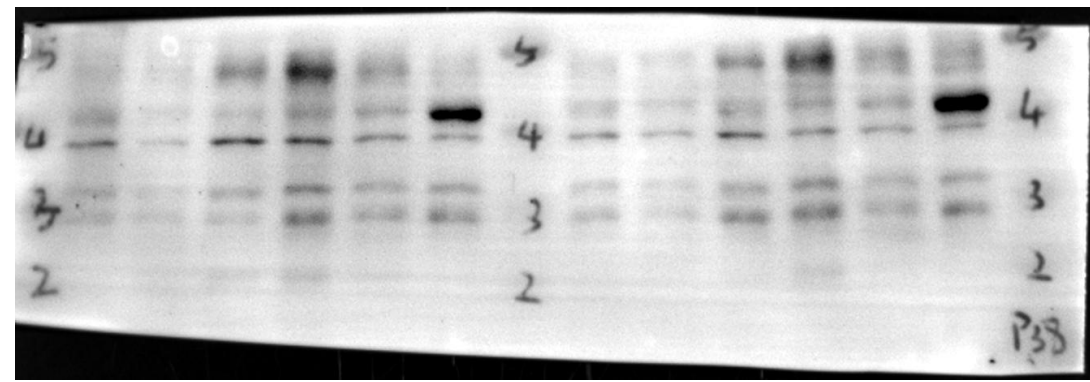

GAPDH 36kD

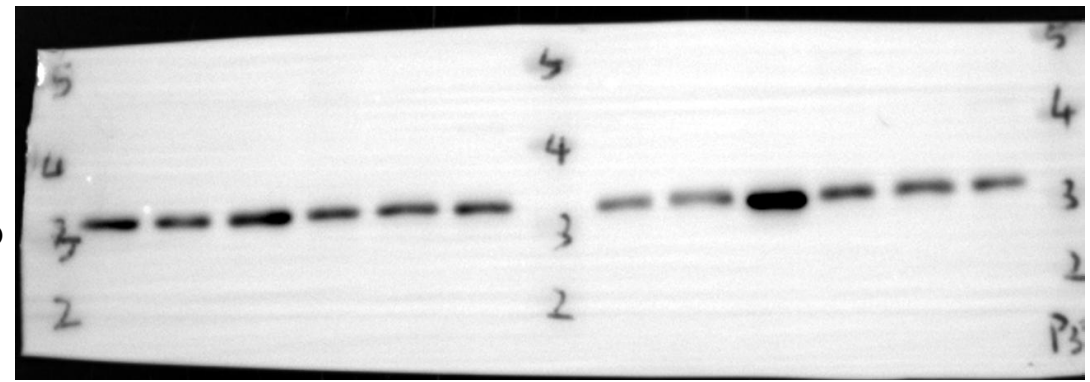

55  
40  
35  
25

55  
40  
35  
25

CON

EA

CON

EA

CON

EA

Figure.4A

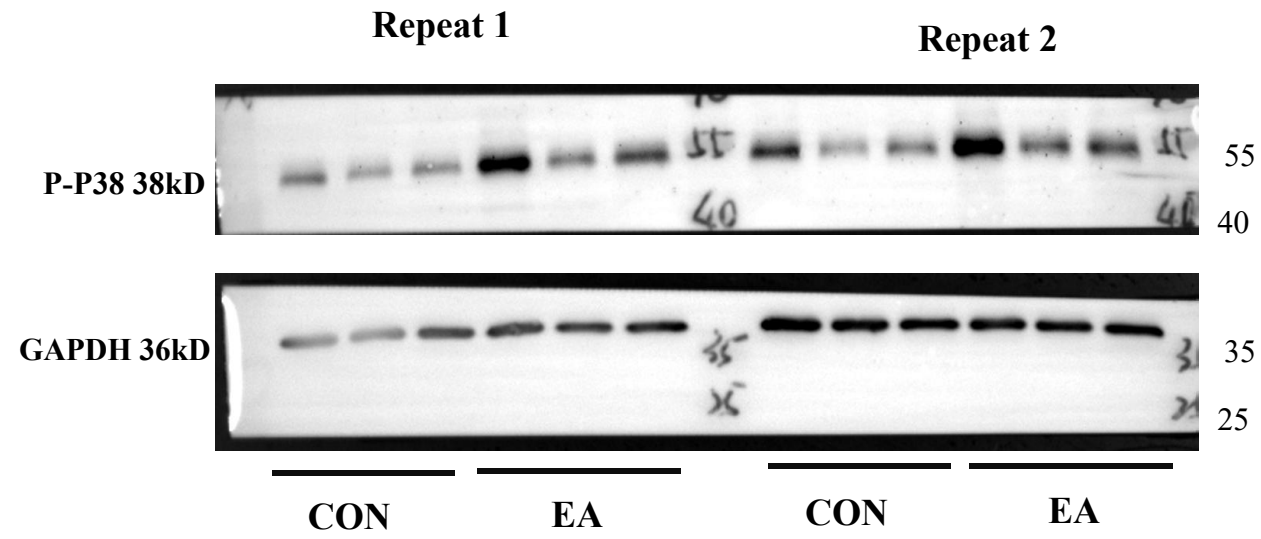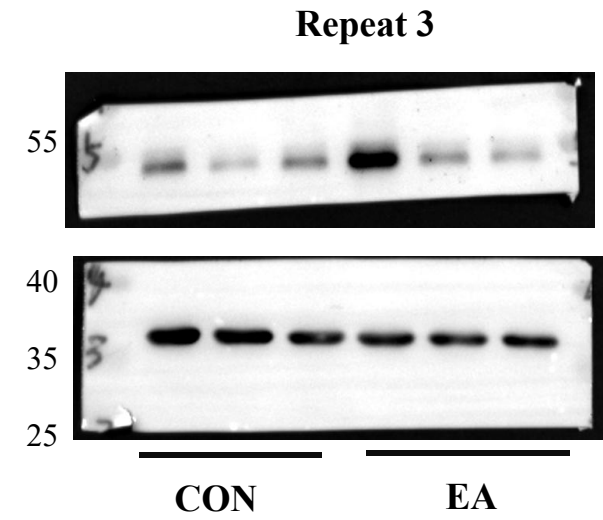

Figure.5D

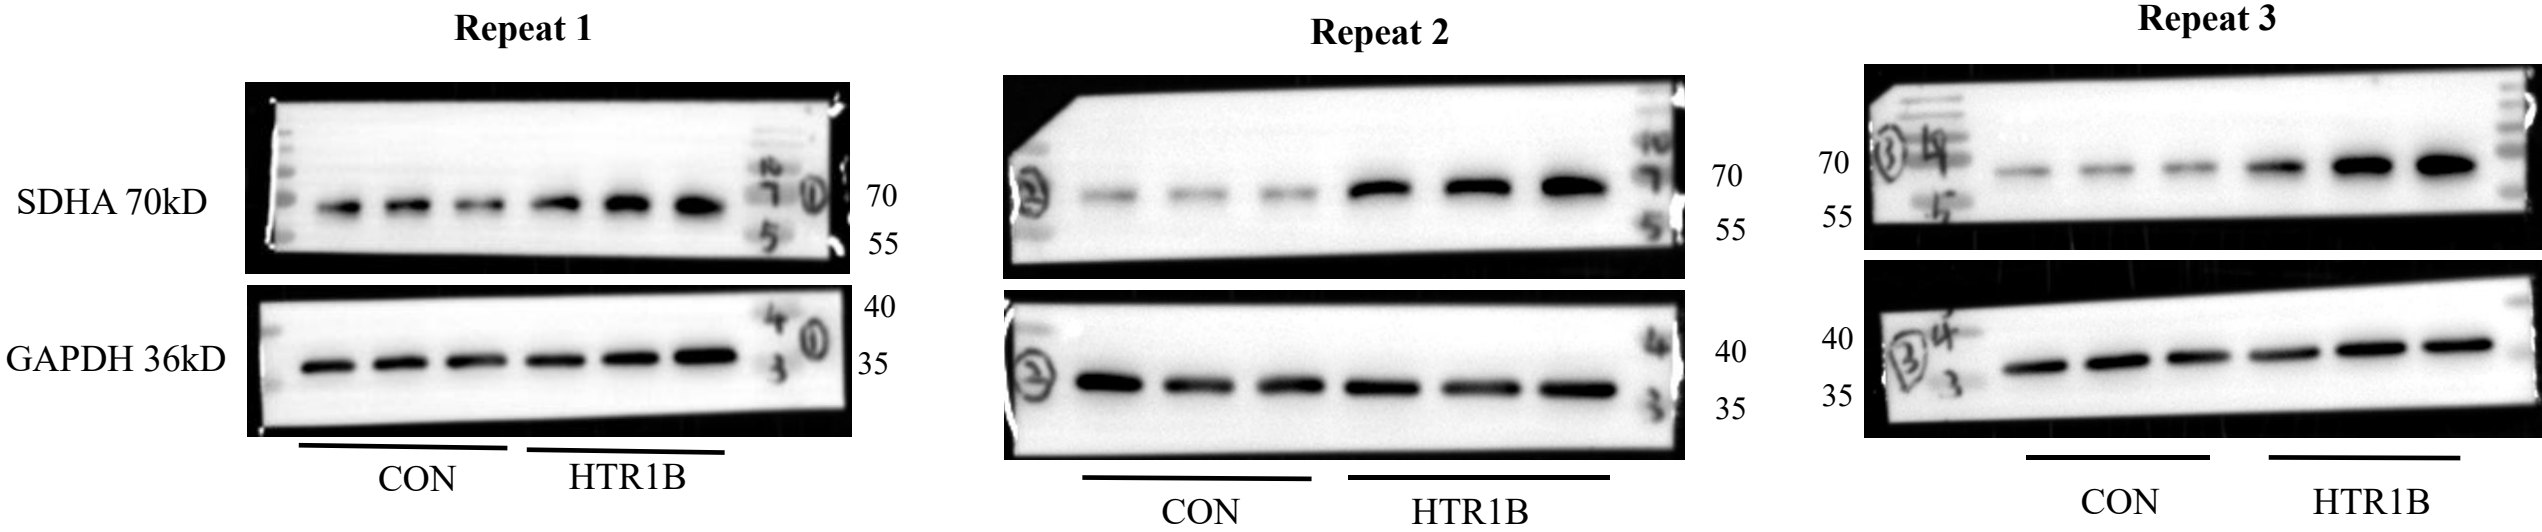

Figure.5D

Repeat 1

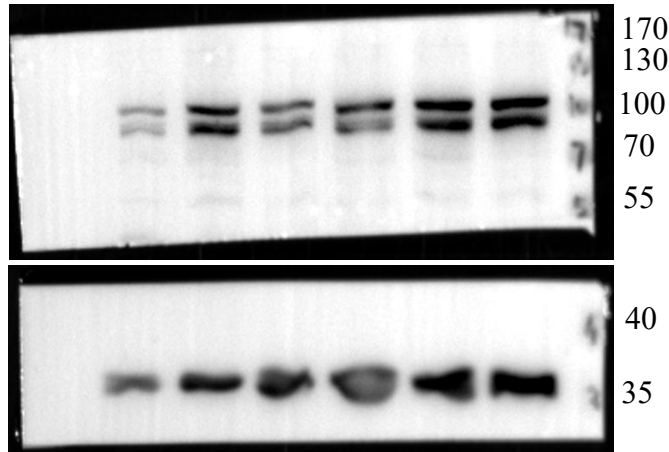

CON

HTR1B

Repeat 2

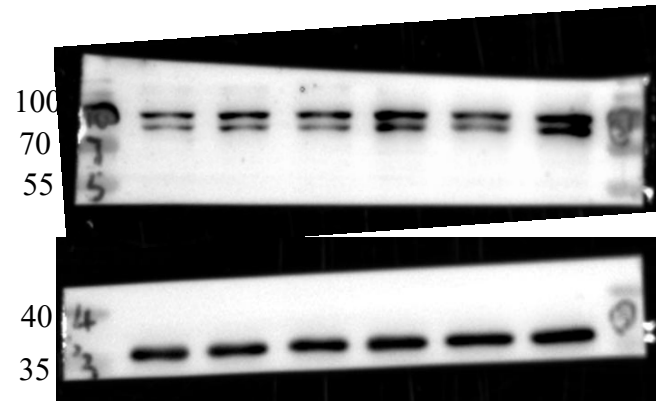

CON

HTR1B

Repeat 3

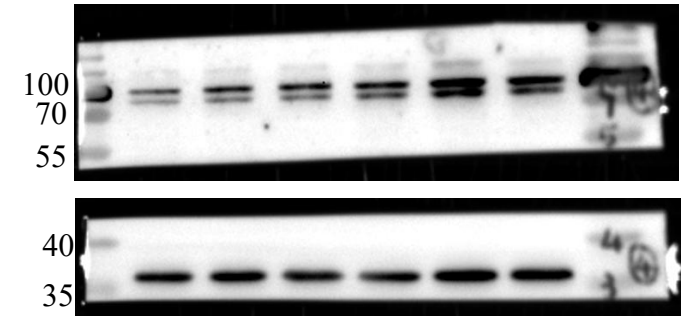

CON

HTR1B

Figure.5D

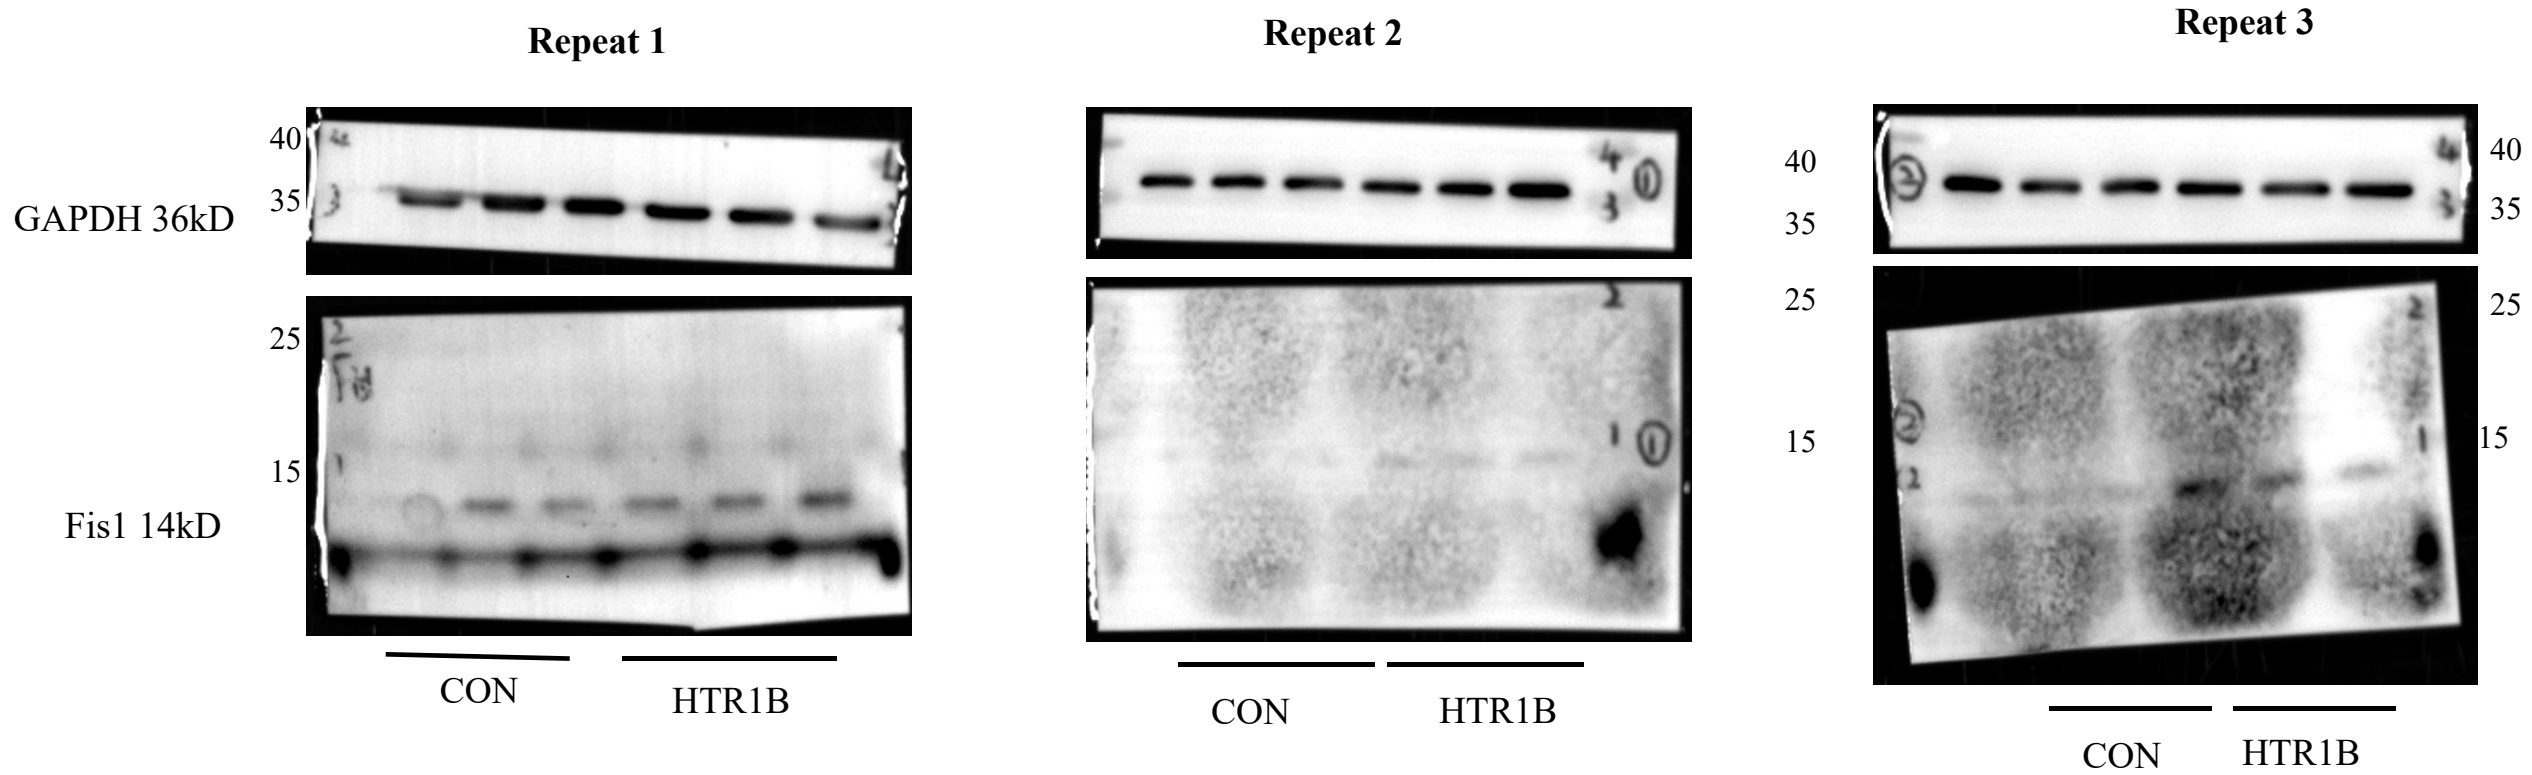

Figure.5M

Repeat 1

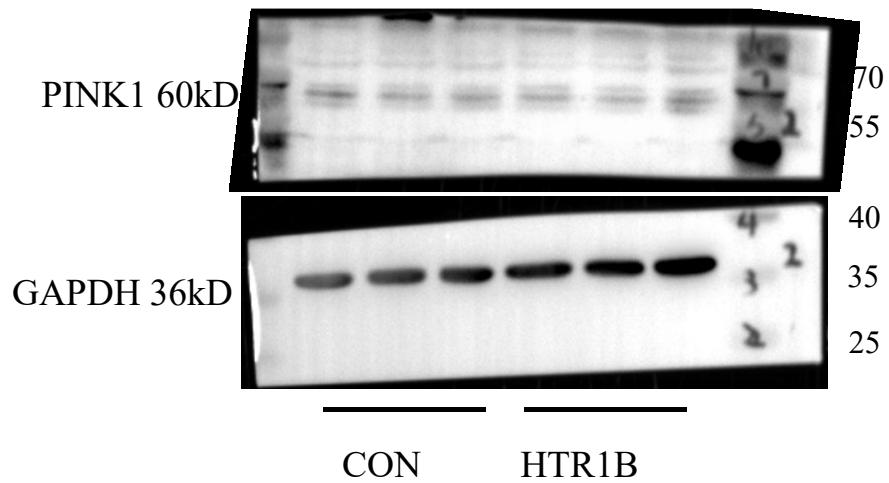

Repeat 2

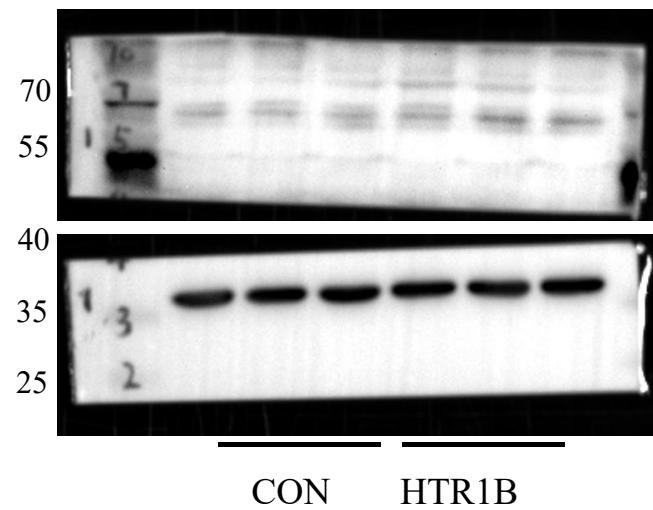

Repeat 3

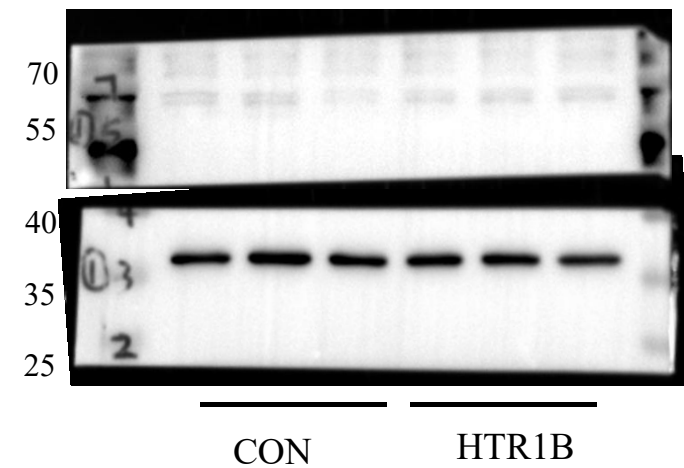

Figure.5M

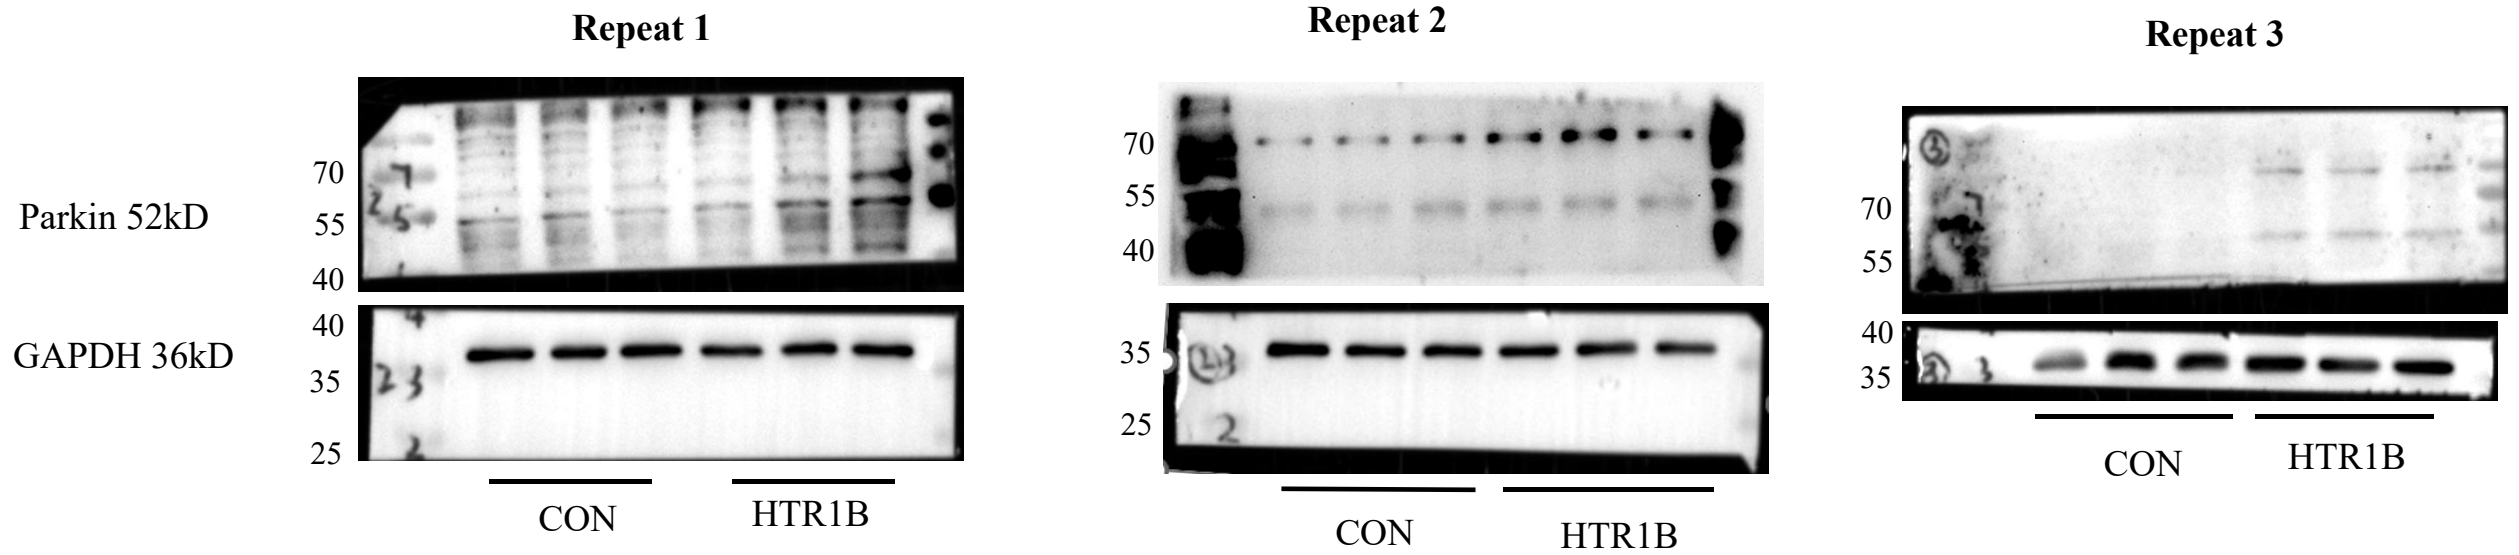



Figure.5M

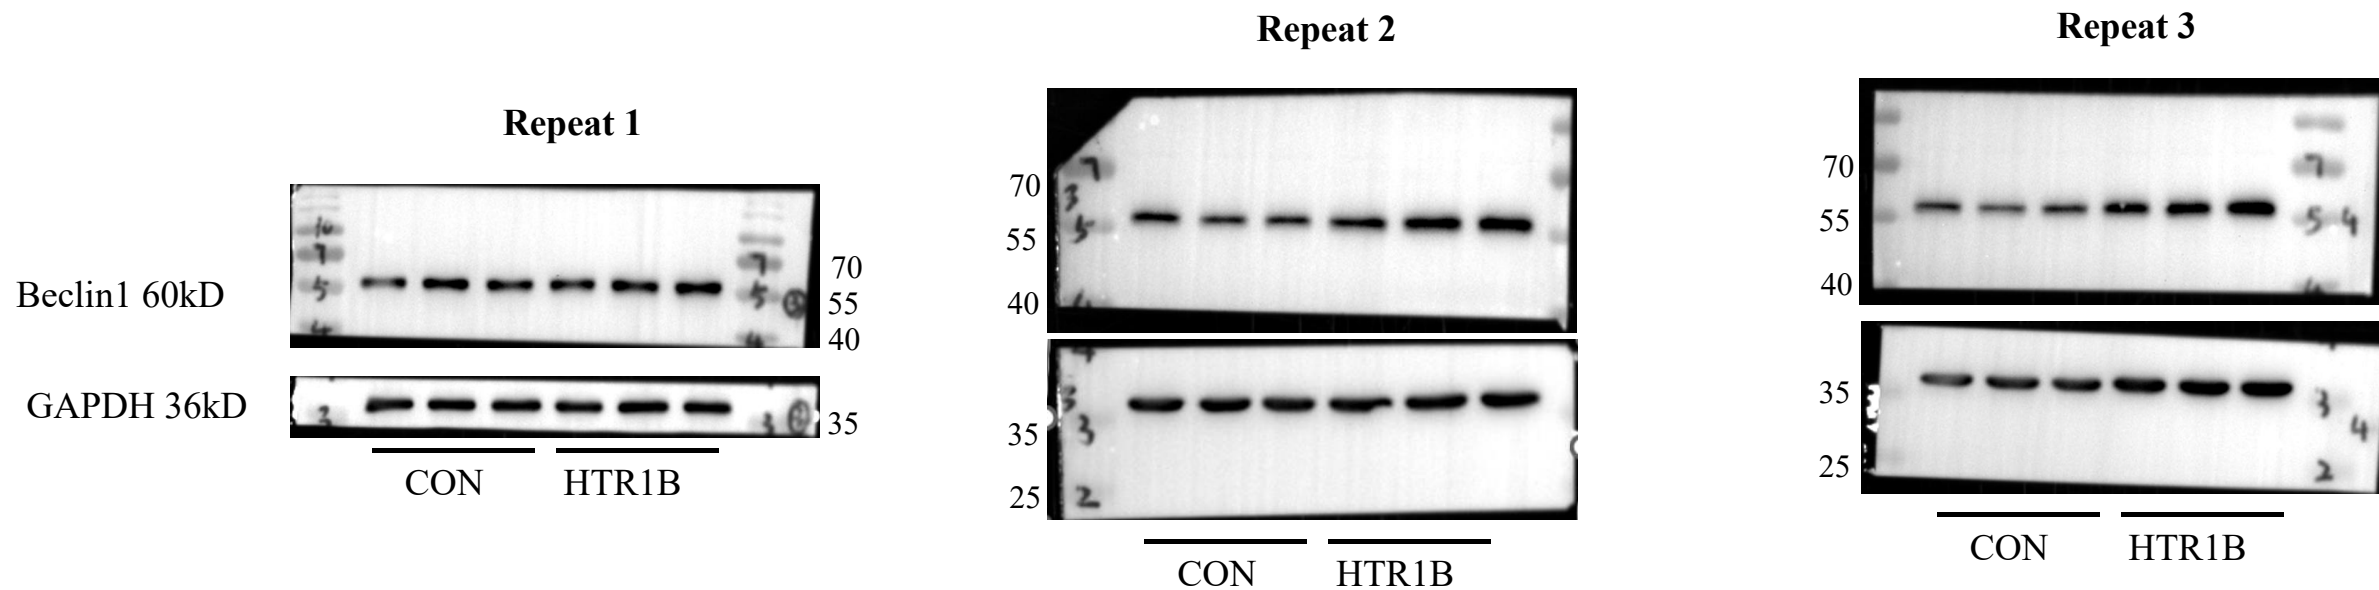

Figure.5M

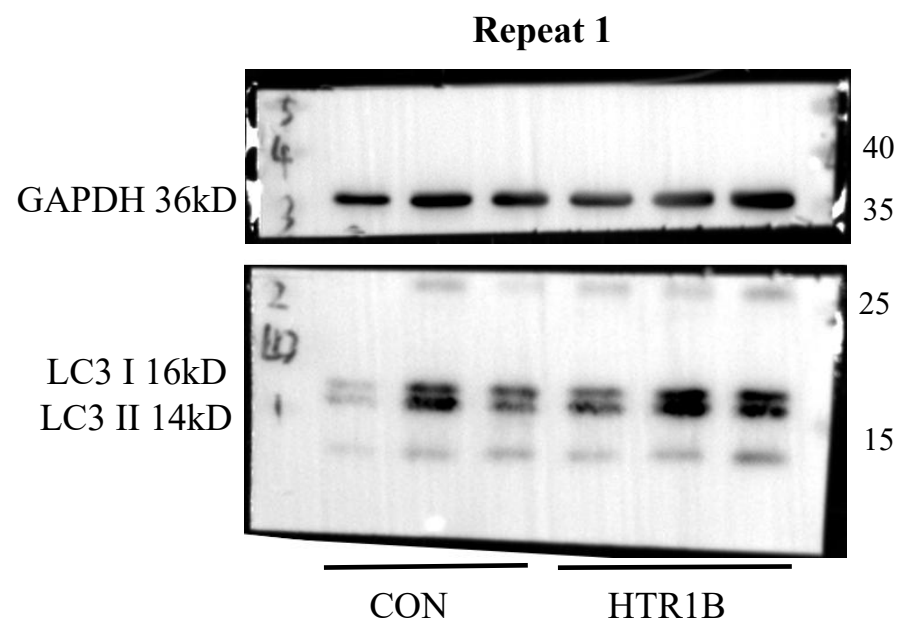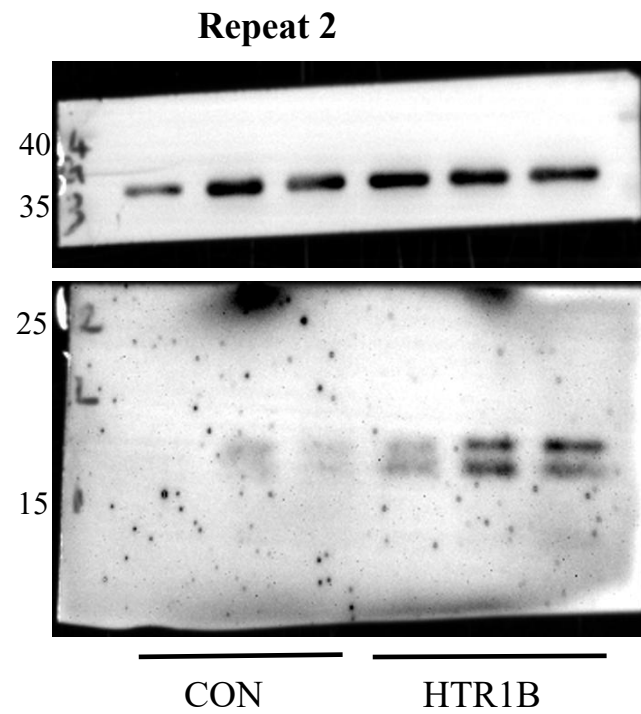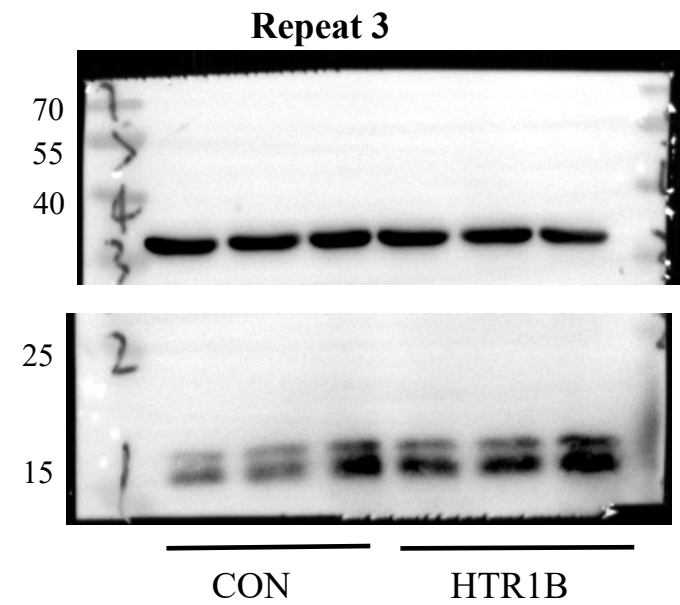

Figure.6A

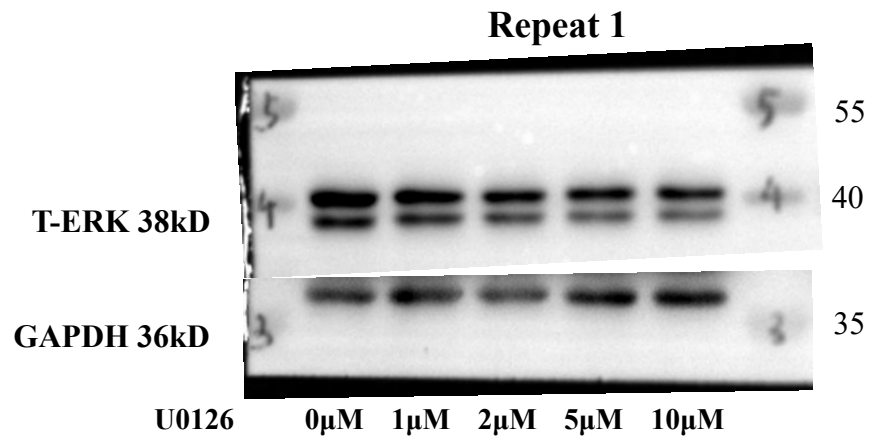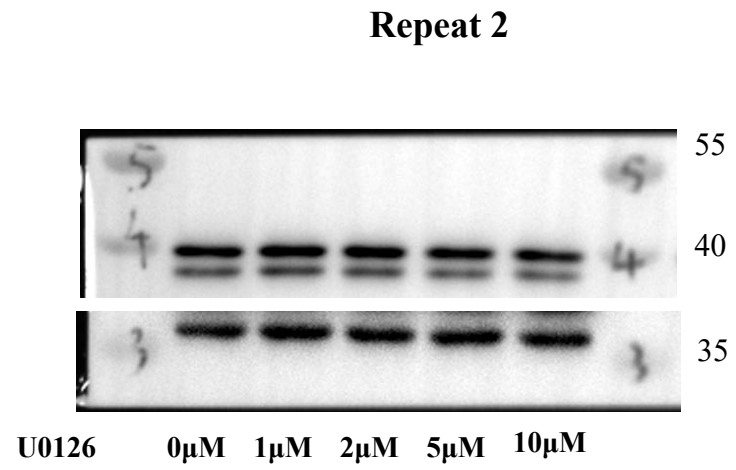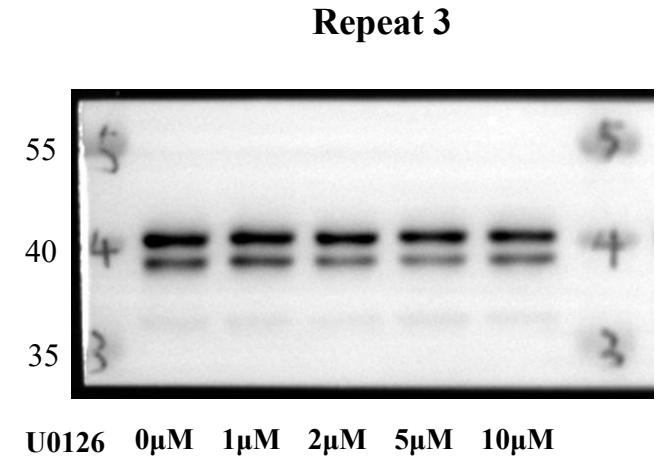

Figure.6A

Repeat 1

Repeat 2

Repeat 3

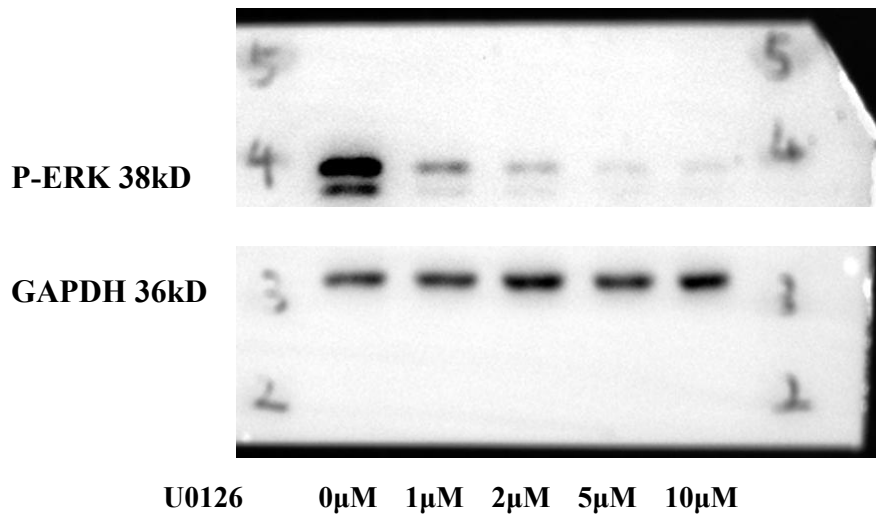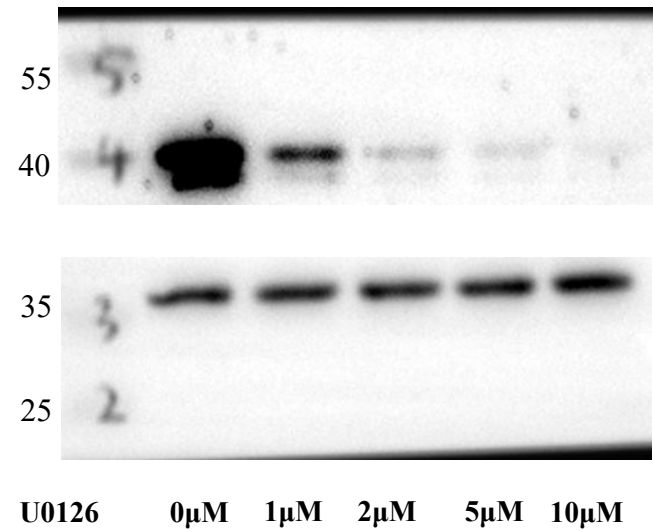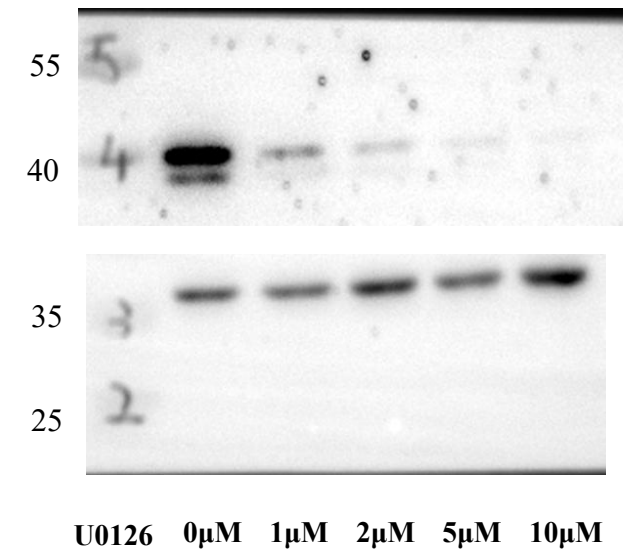

Figure.6C

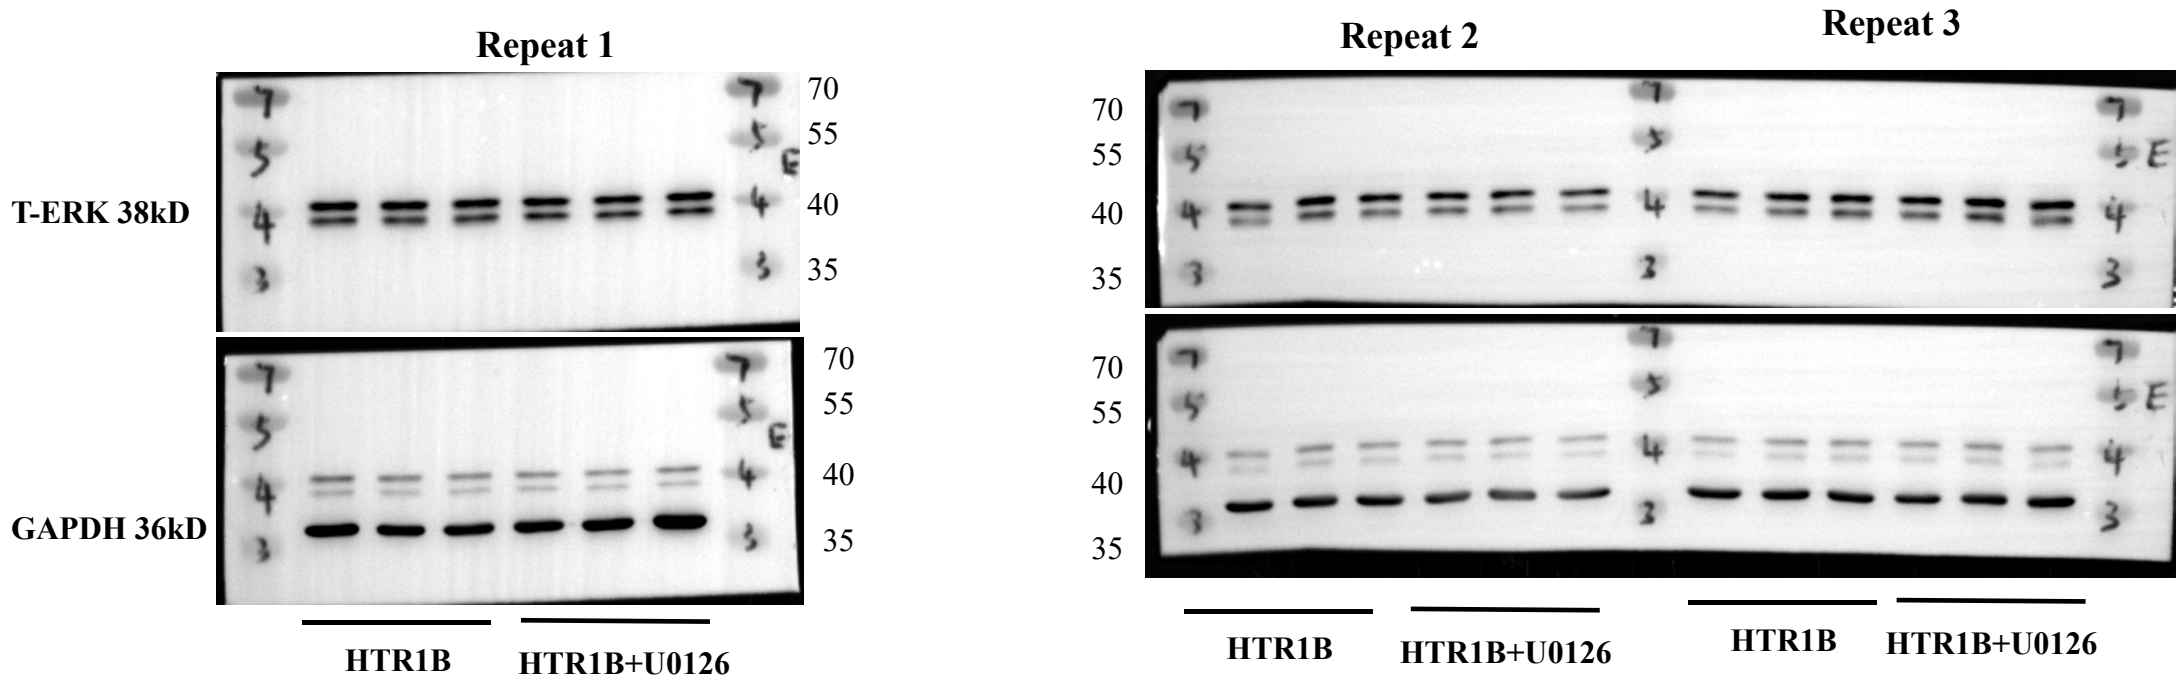

Figure.6C

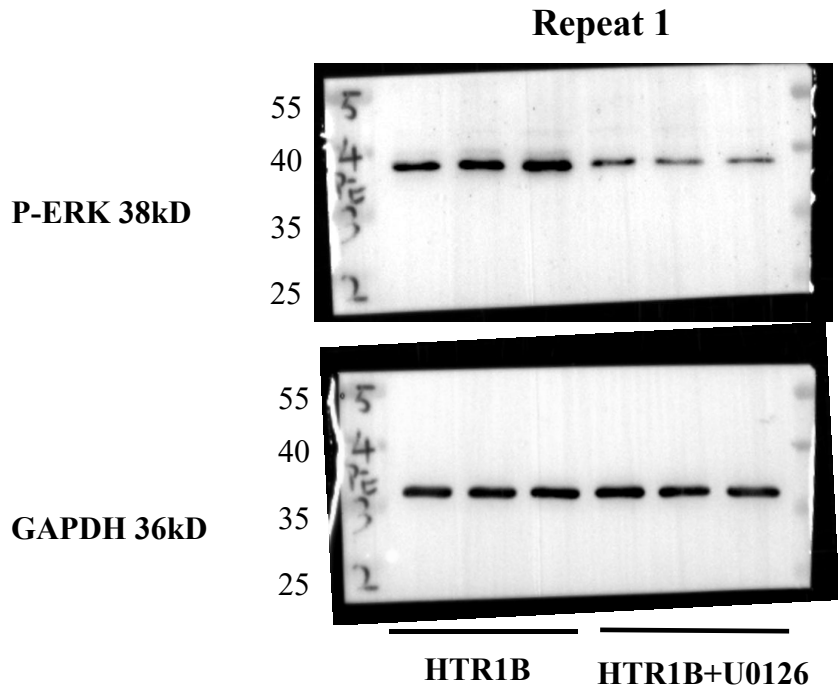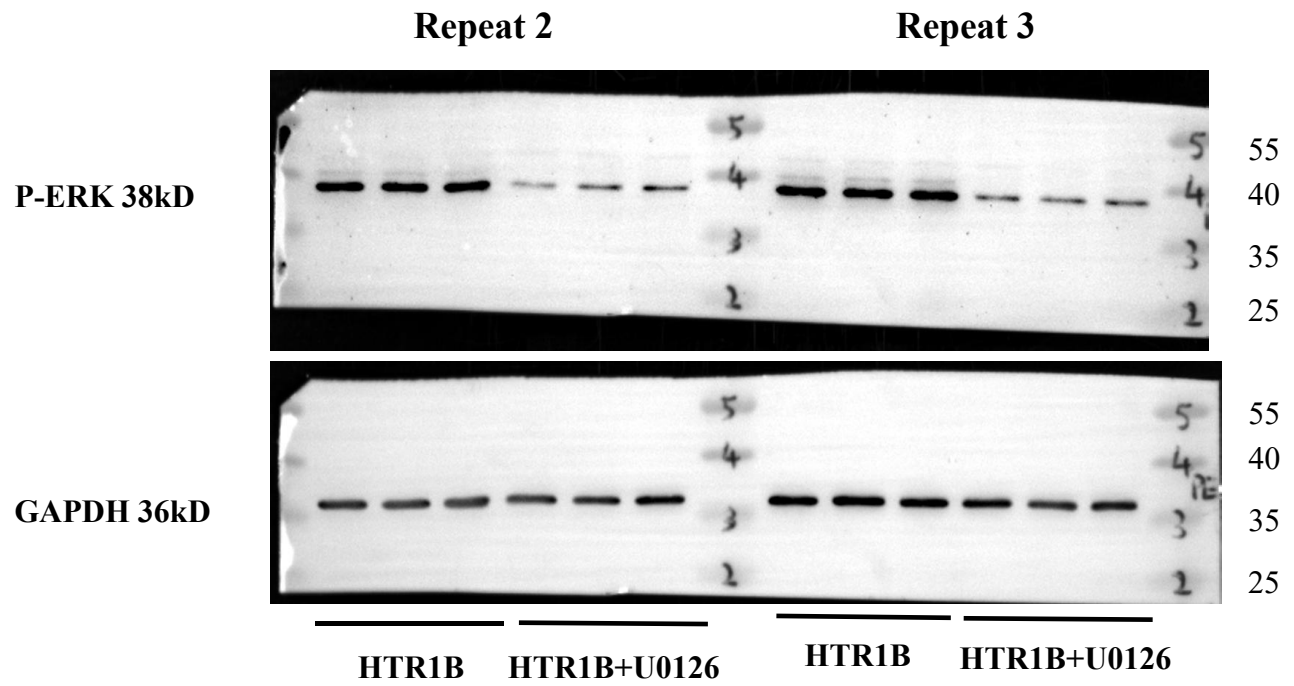

Figure.6F

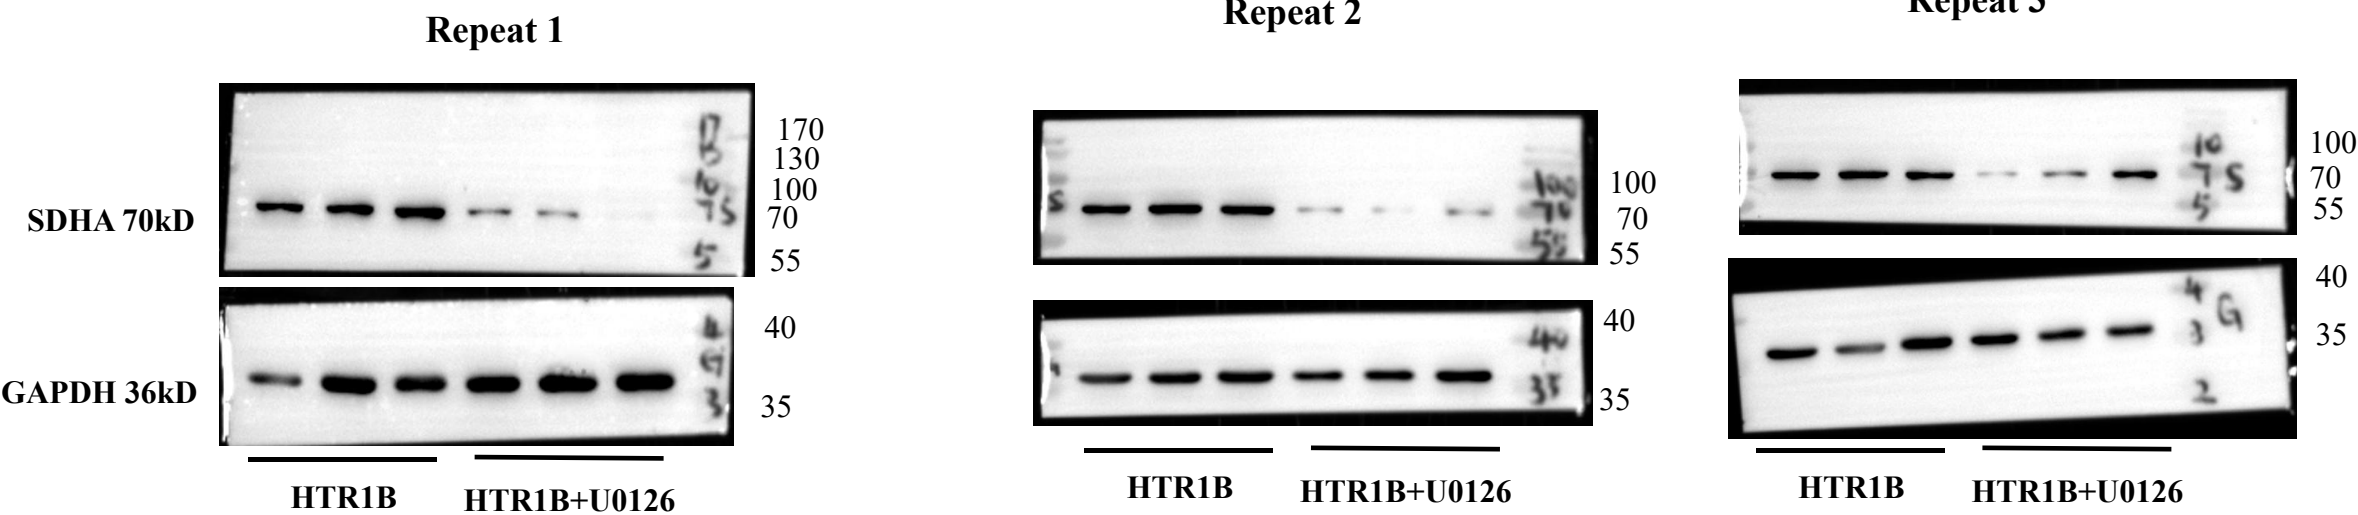

Figure.6F

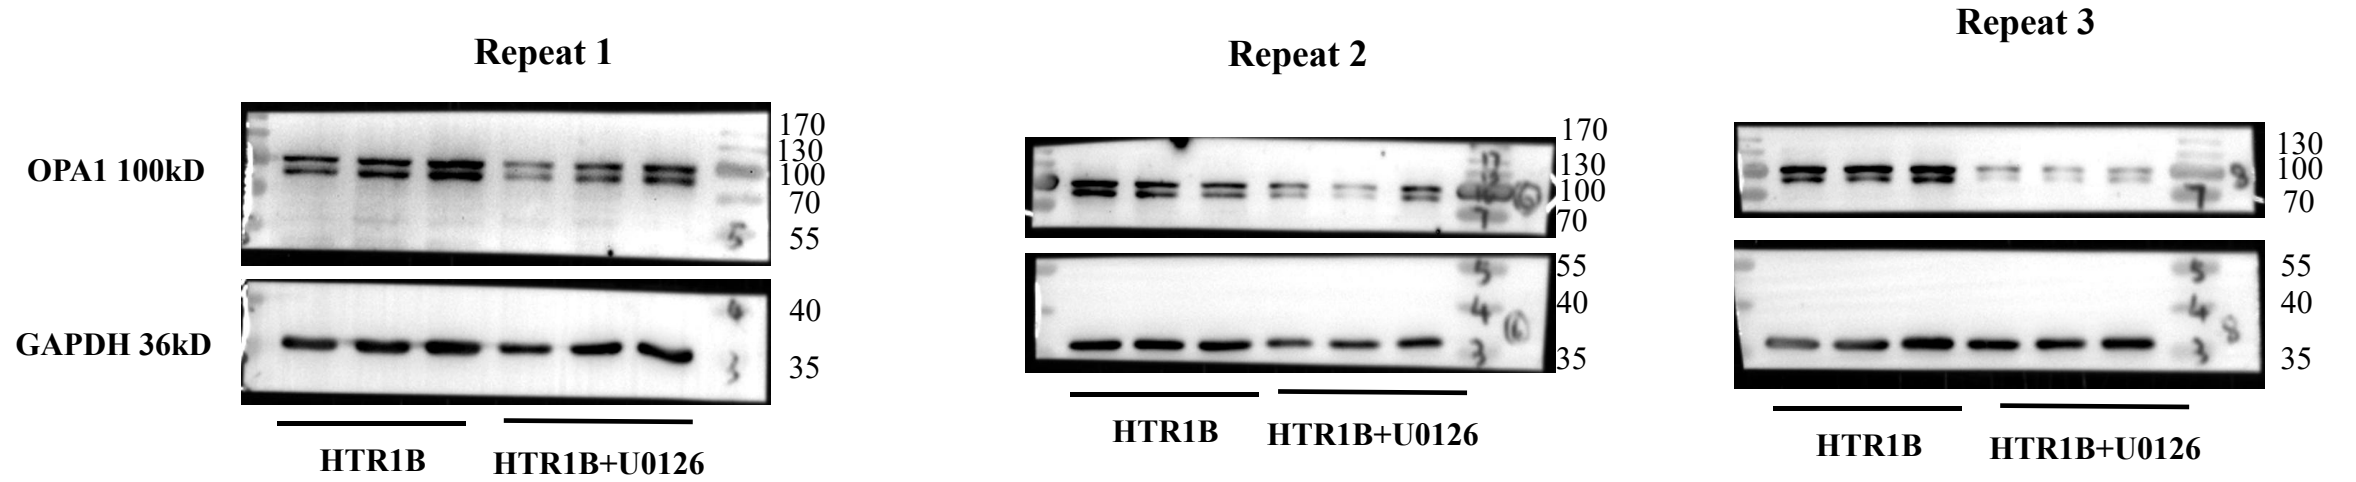



Figure.6F

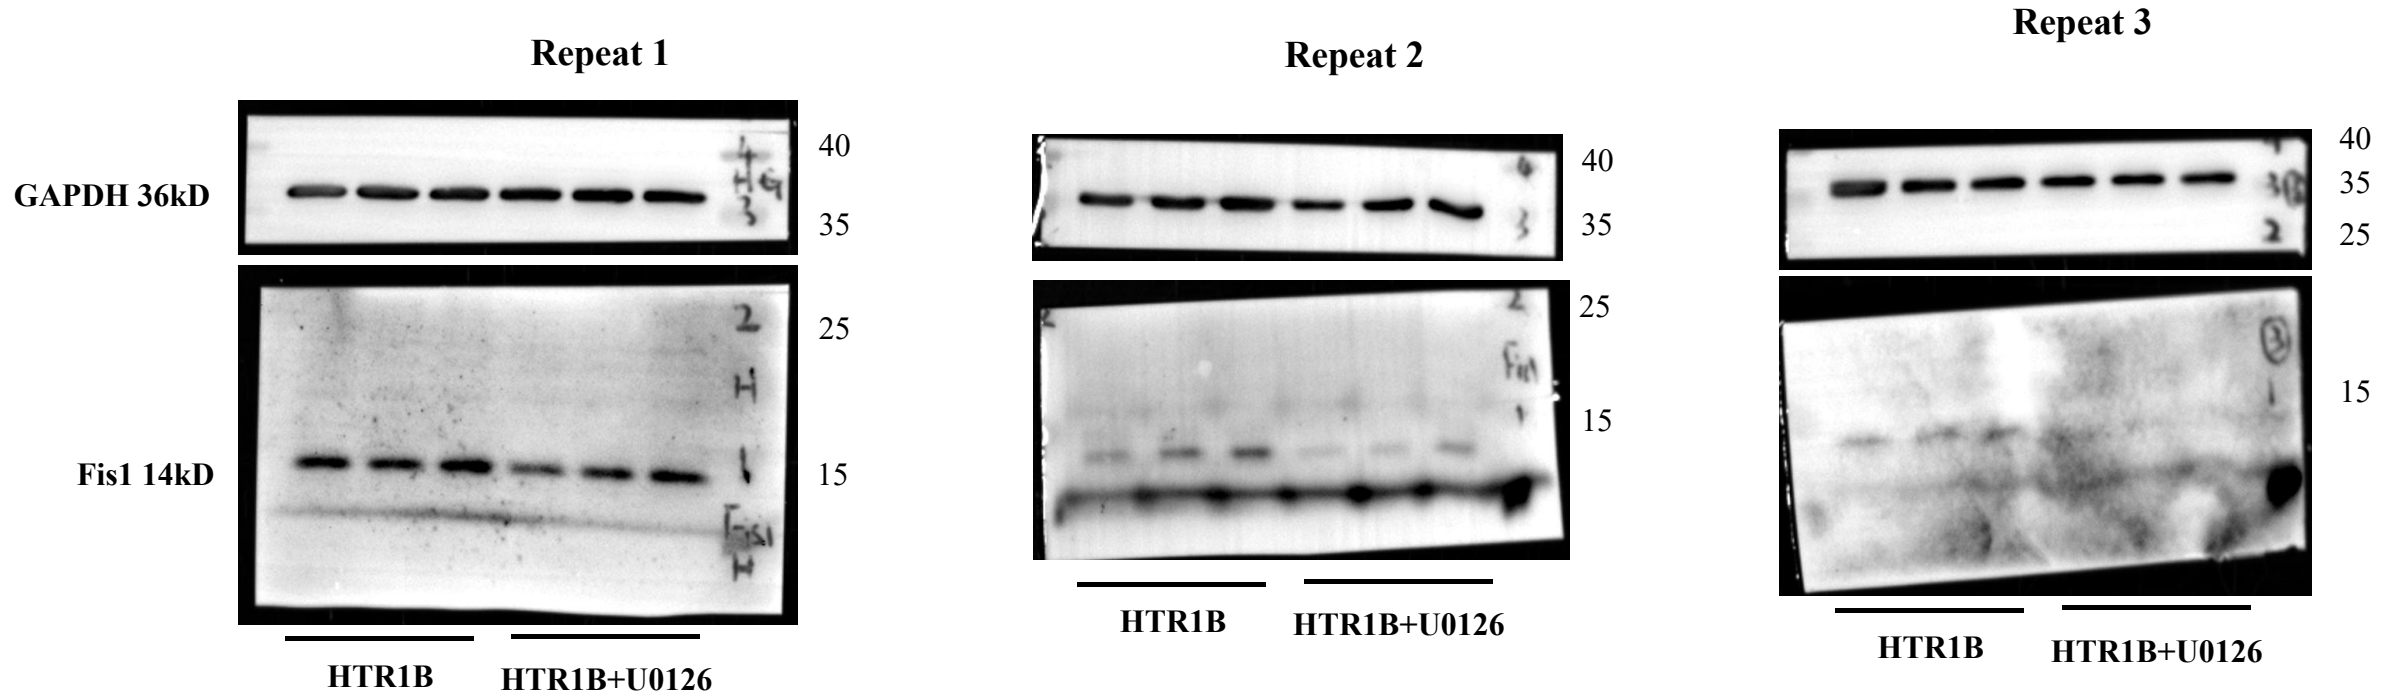

Figure.6F

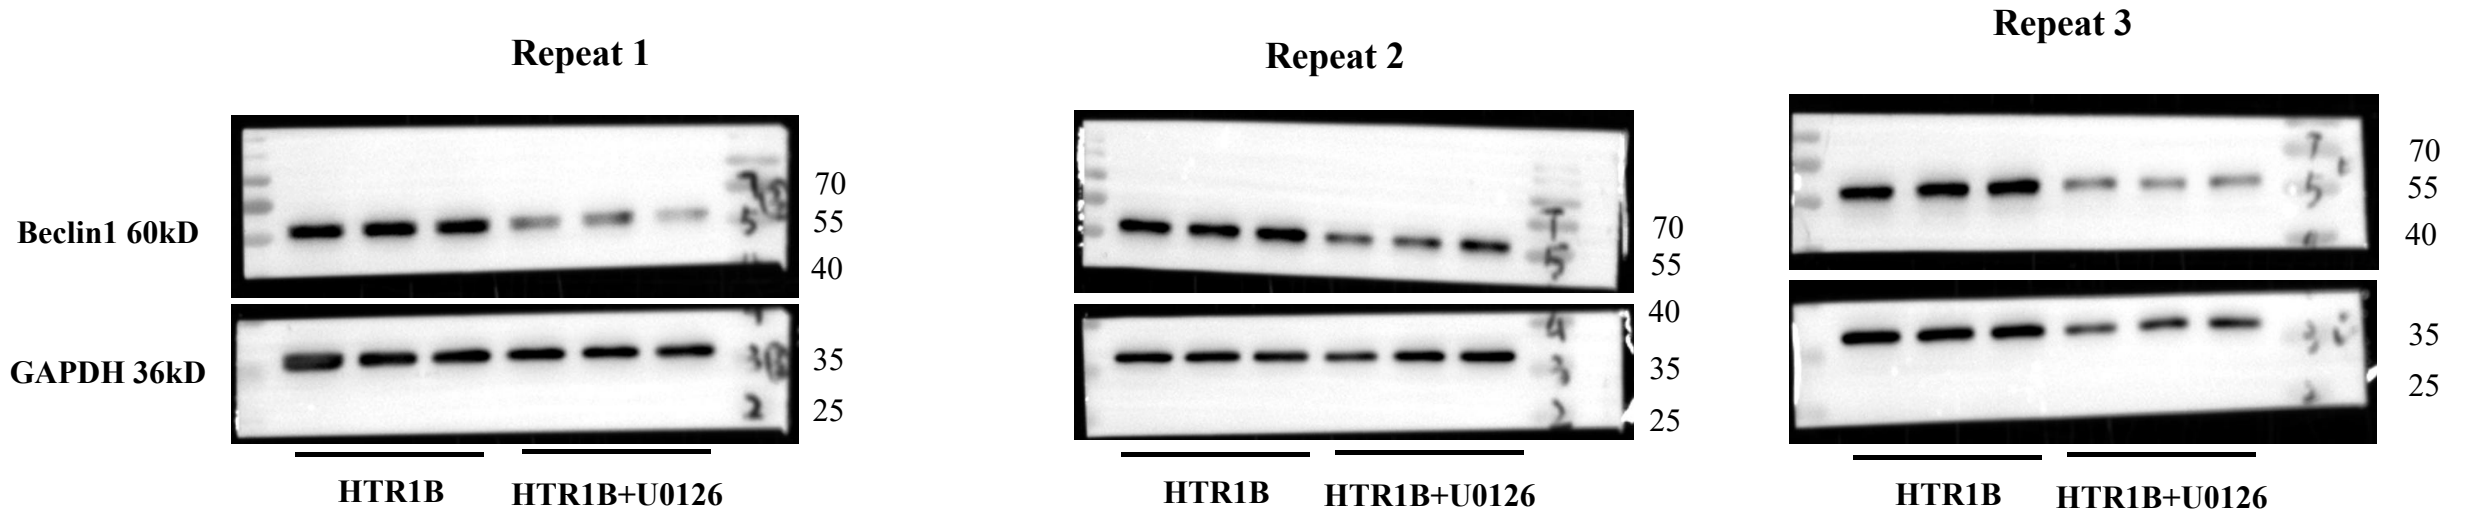

Figure.6F

Repeat 1

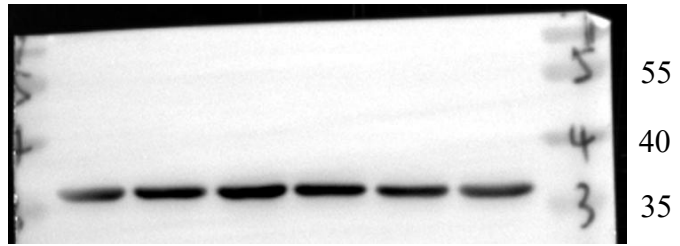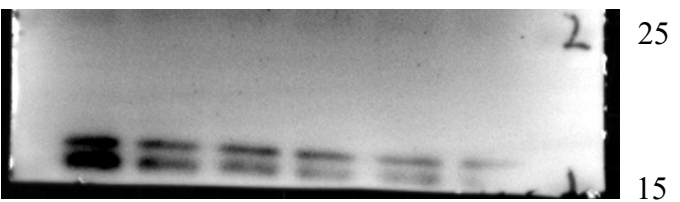

HTR1B HTR1B+U0126

Repeat 2

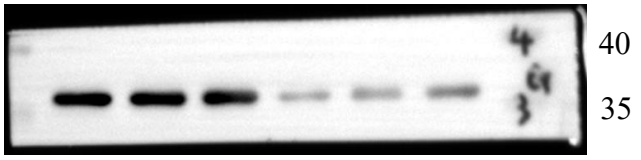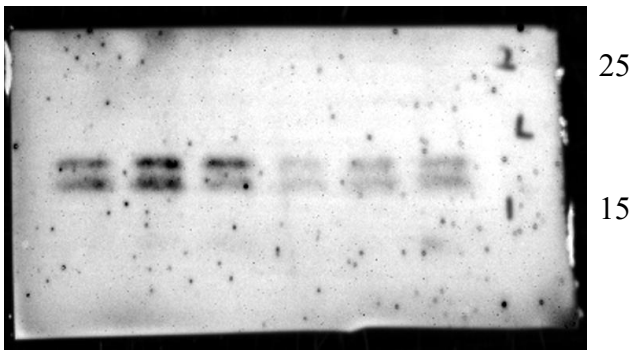

HTR1B HTR1B+U0126

Repeat 3

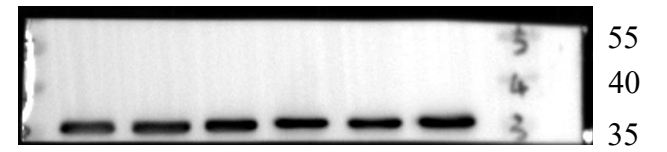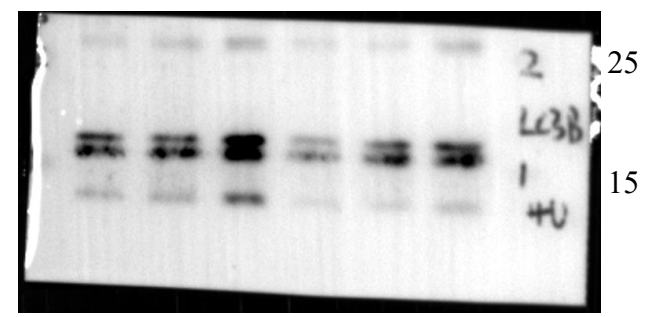

HTR1B HTR1B+U0126

Figure.S1A

Repeat 1

Repeat 2

Repeat 3

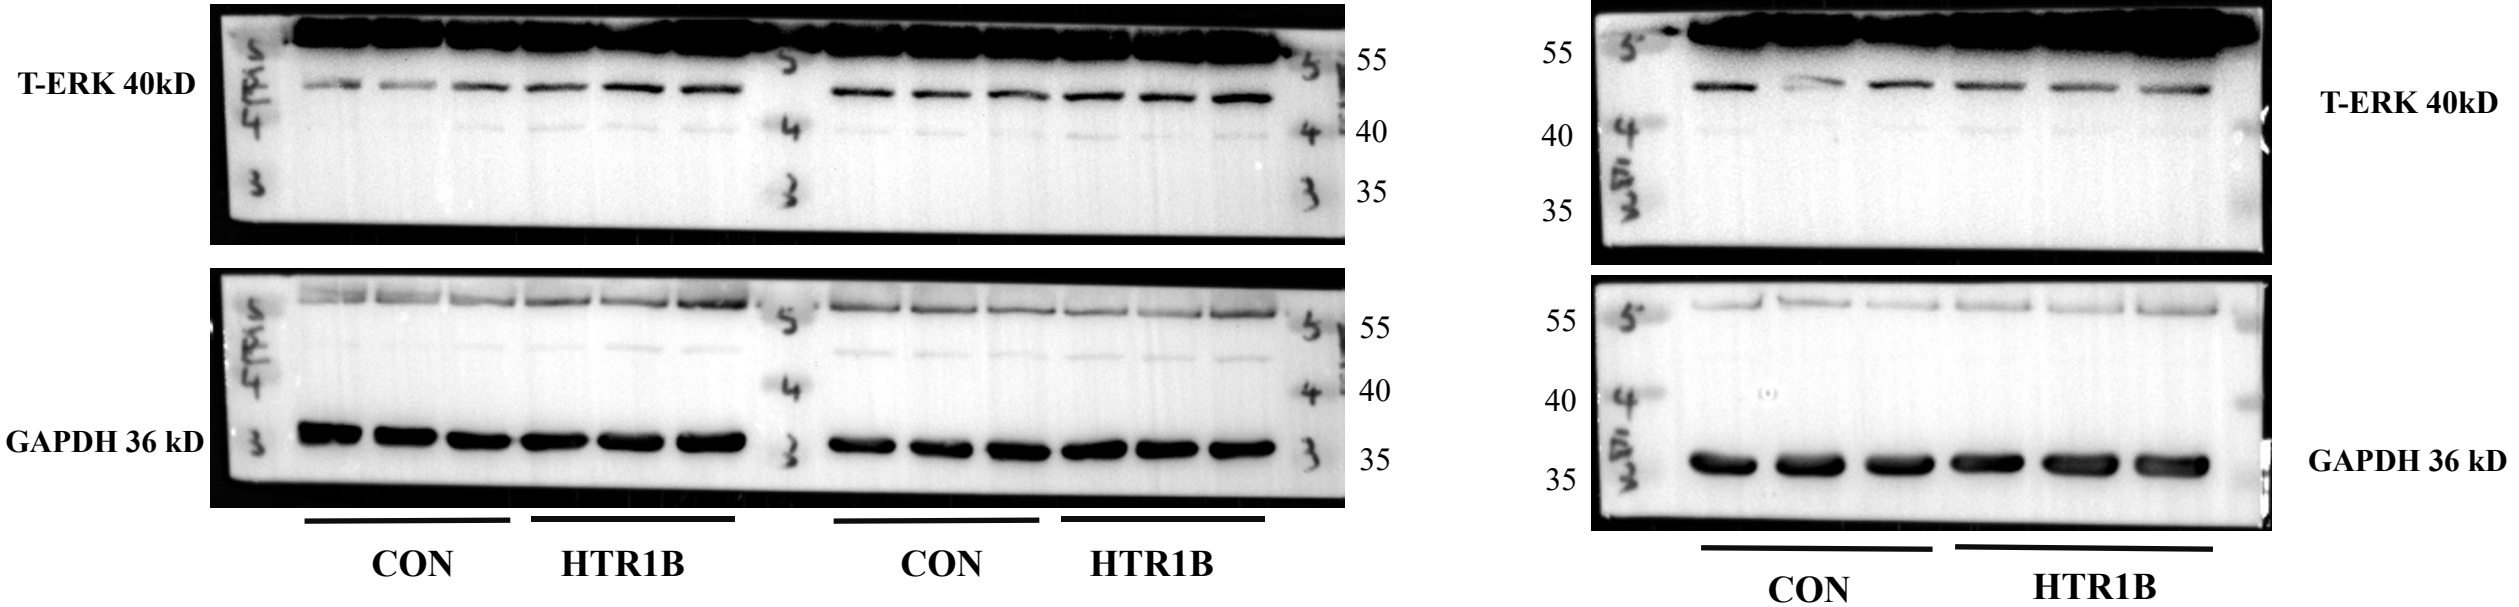

Figure.S1A

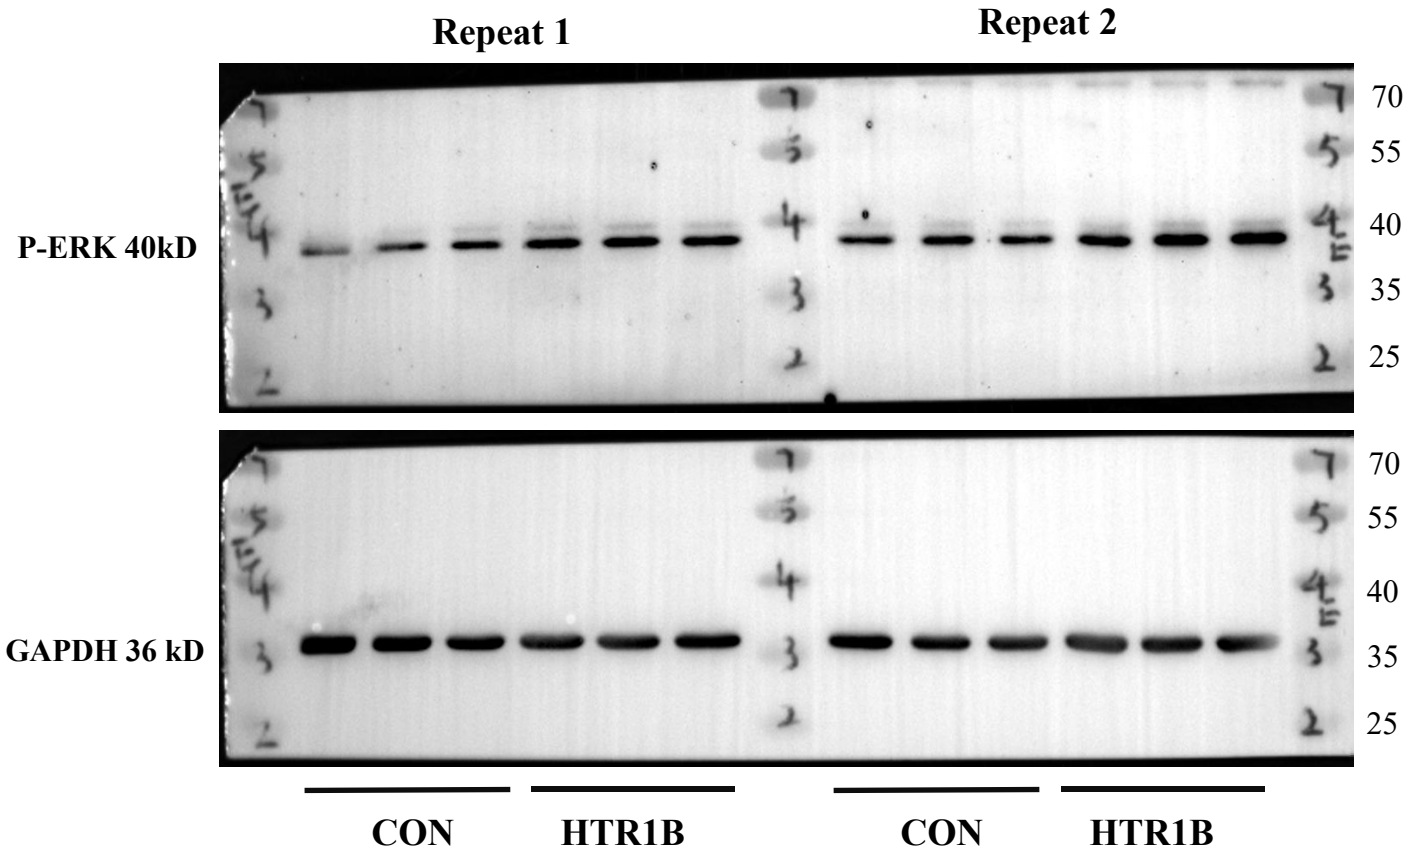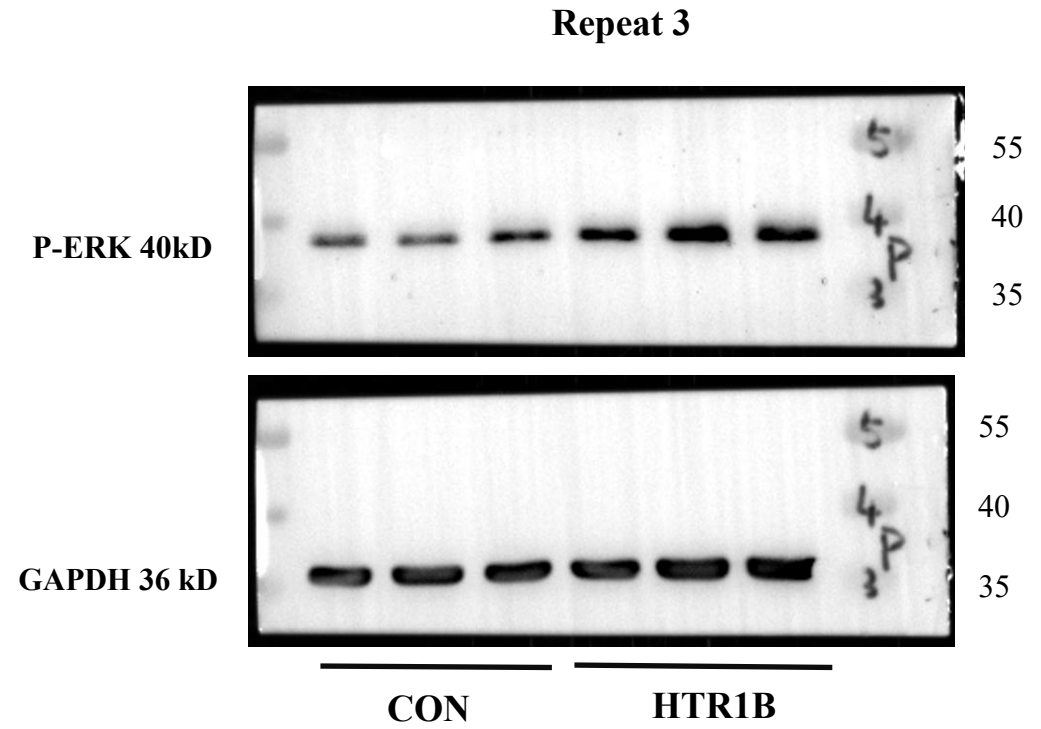

Figure.S1A

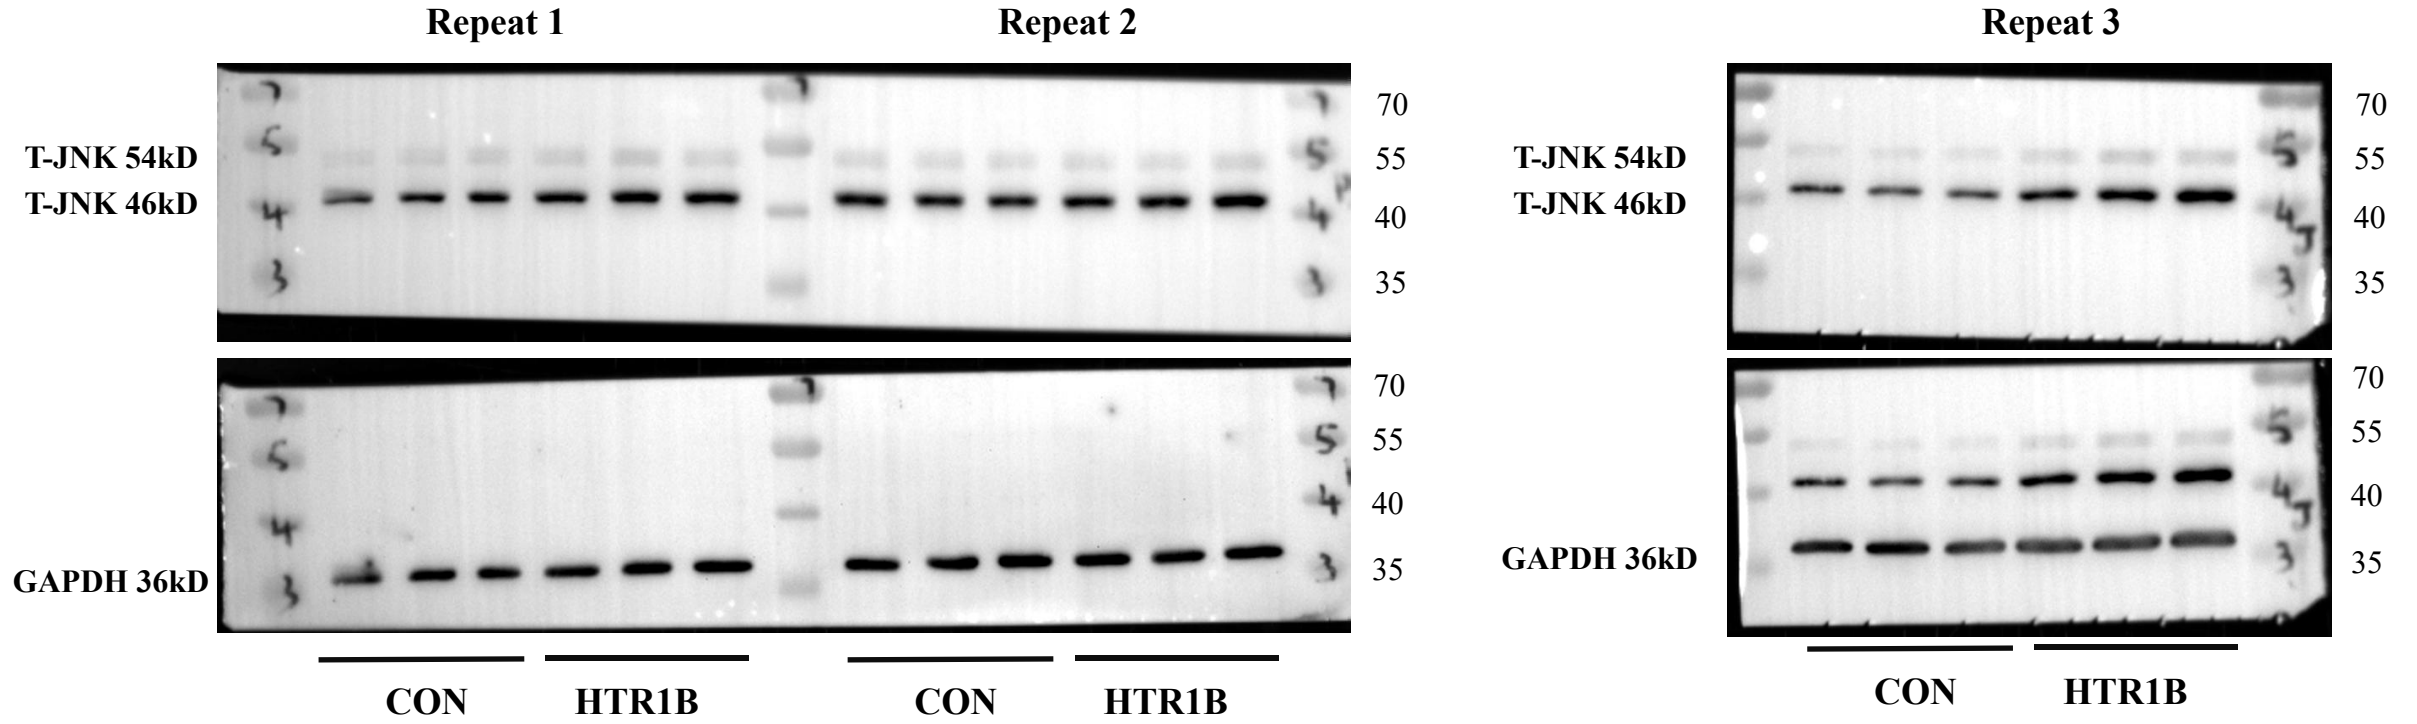

Figure.S1A

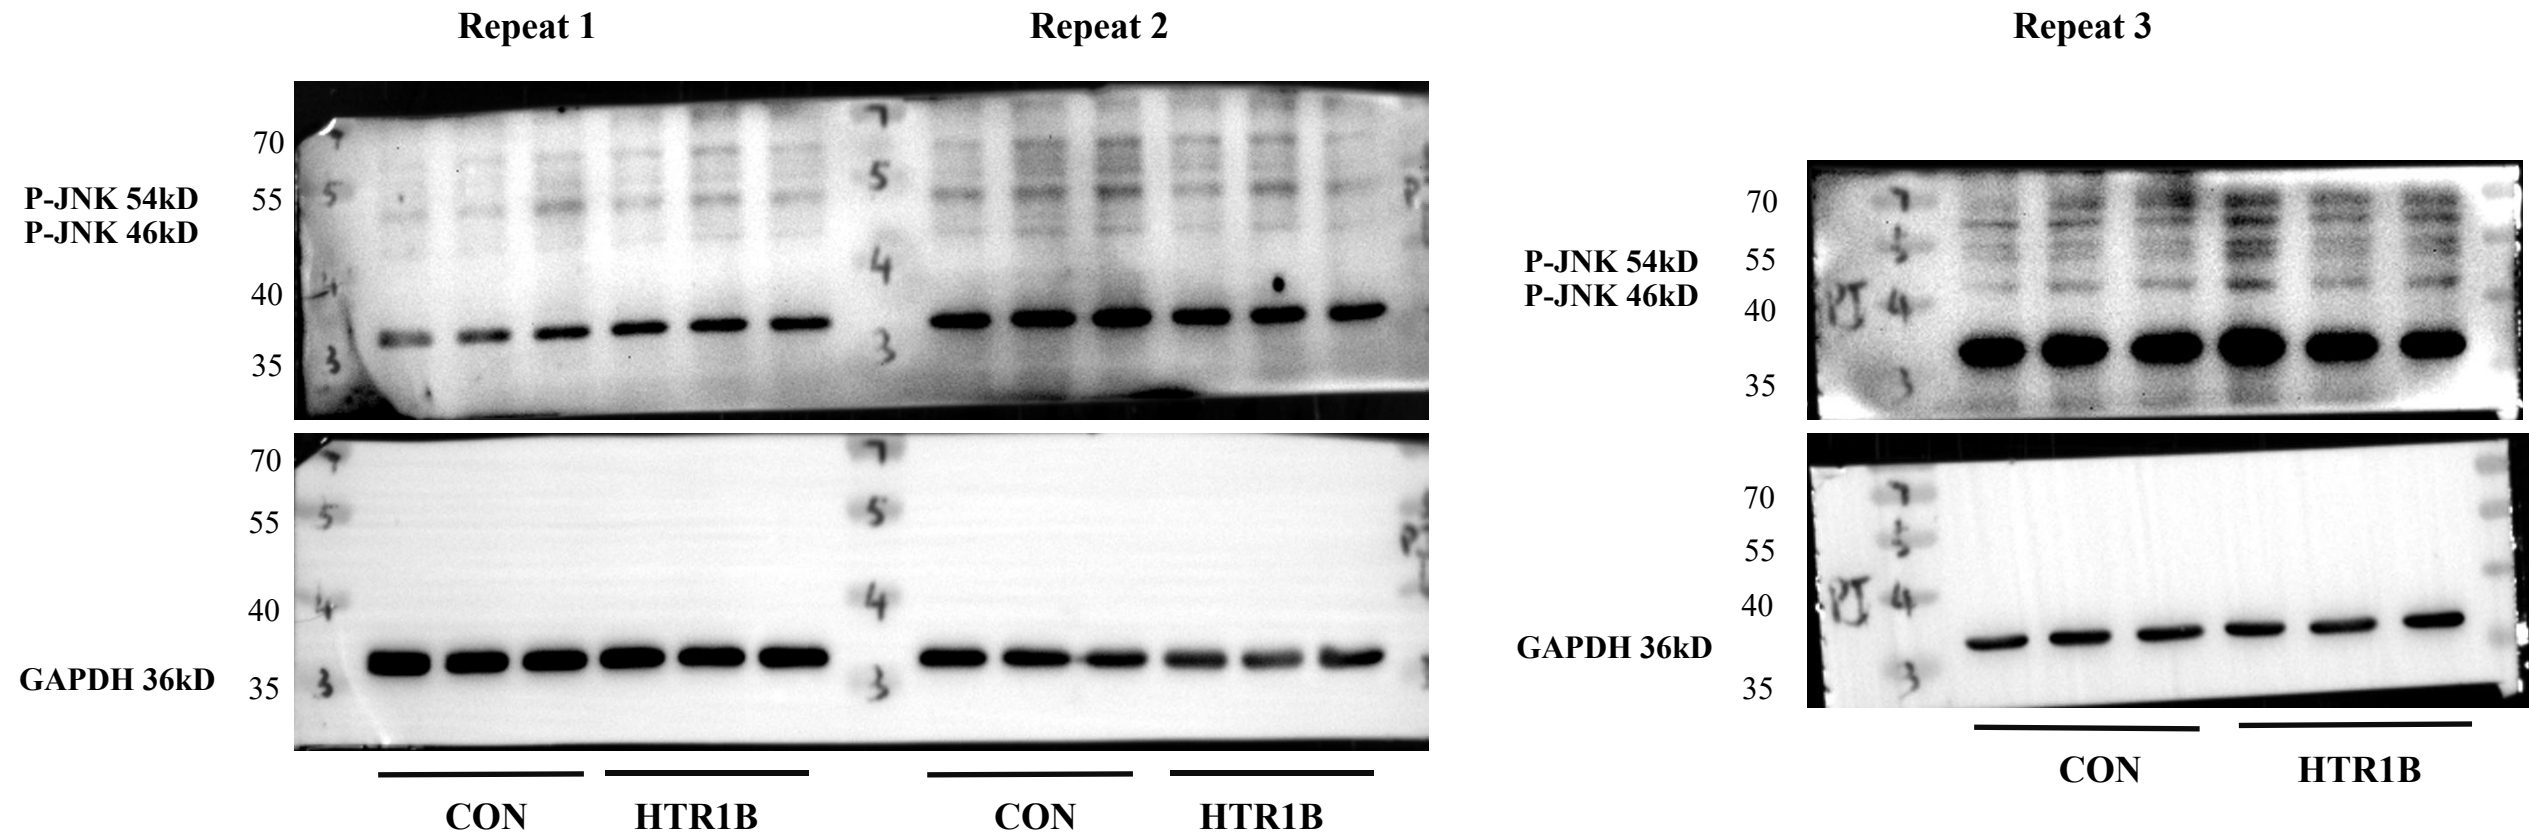

Figure.S1A

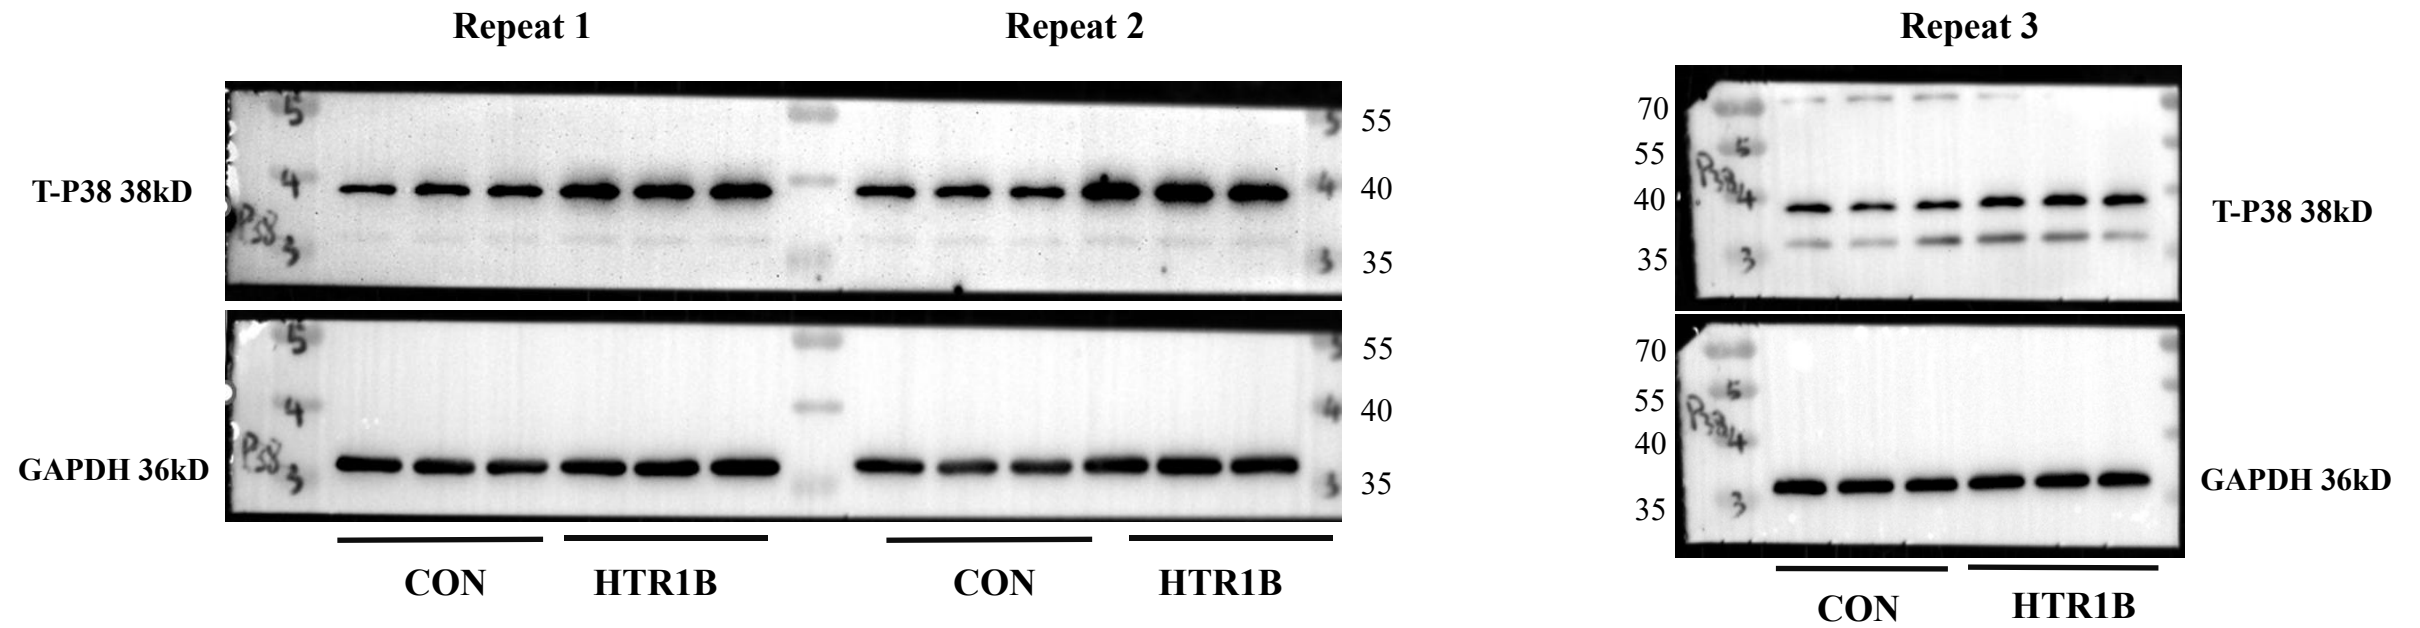



Figure.S1A

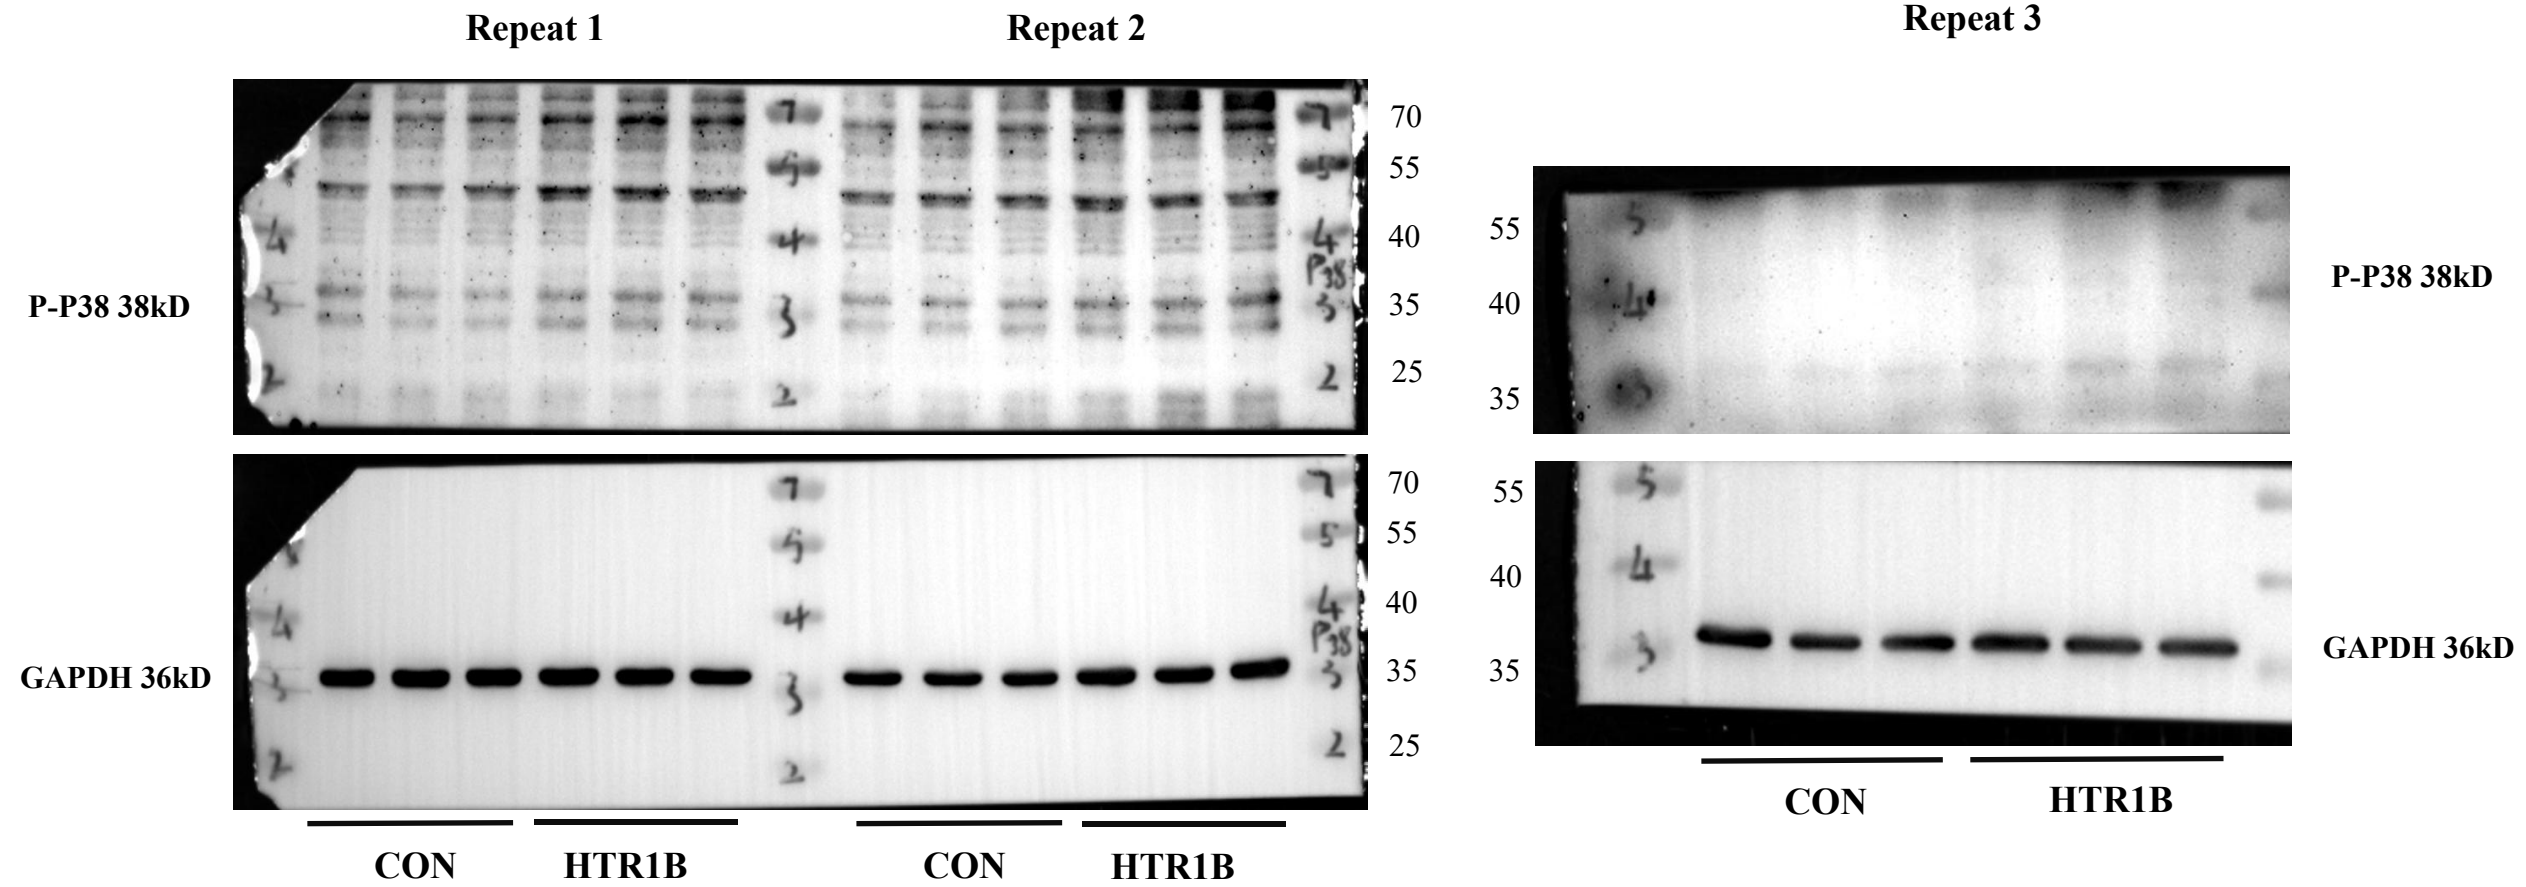

Supplement: mmc1.pdf [file mmc1.pdf]
